*Research Article*

**Small dendritic synapses enhance temporal coding in a model of cochlear nucleus bushy cells**

Elisabeth Koert and Thomas Kuenzel\*

*Auditory Neurophysiology Group, Department of Chemosensation, RWTH Aachen University, Aachen, Germany*

\* Corresponding Author:

Dr. Thomas Kuenzel,  
Auditory Neurophysiology Group, Department of Chemosensation, RWTH Aachen University,  
Worringer Weg 3, D-52074 Aachen,  
Germany  
kuenzel@bio2.rwth-aachen.de

**Running Title:** Dendritic inputs to spherical bushy cells.

**Keywords:** Auditory Brainstem, Bushy Cell, Endbulb of Held, Phase-locking, Dendritic Inputs

**Conflict of Interest Statement:** The authors declare that the research was conducted in the absence of any commercial or financial relationships that could be construed as a potential conflict of interest.

**Author Contributions:** TK conceived and designed the study. TK and EK coded the model and analyzed data. EK and TK wrote the manuscript.

**Funding:** This work was supported by the DFG Priority Program 1608 "Ultrafast and temporally precise information processing: Normal and dysfunctional hearing" [KU2529/2-2]

**Acknowledgments:** We thank Stefanie Kurth and Charlène Gillet (Department of Chemosensation, Institute of Biology II, RWTH Aachen University) for providing biocytin-labeled bushy cells and excellent technical assistance with the 3D-reconstruction of neurons.

Number of pages: 38 (with images)

Number of figures: 11

Number of tables: 1

Number of words in abstract: 245

Number of words in manuscript body: 8717

## 1 **Abstract**

2 Spherical bushy cells (SBC) in the the anteroventral cochlear nucleus can improve the temporal precision  
3 of the auditory nerve spiking activity despite receiving sometimes only a single suprathreshold axosomatic  
4 input. The interaction with small dendritic inputs could provide a possible explanation for this phenomenon.  
5 In a compartment model of spherical bushy cells with a stylized or realistic three-dimensional representation  
6 of the bushy dendrite we explored this proposal. Phase-locked dendritic inputs caused both a tonic  
7 depolarization and a modulation of the SBC membrane potential at the frequency of the stimulus but for  
8 plausible model parameters do not cause output action potentials (AP). The tonic depolarization increased  
9 the excitability of the SBC model. The modulation of the membrane potential caused a phase-dependent  
10 increase in the efficacy of the main axosomatic input to cause output AP. These effects increased the rate and  
11 the temporal precision of output AP. Rate was mainly increased for stimulus frequencies at and below the  
12 characteristic frequency of the main input. Precision mostly increased for higher frequencies above about  
13 1 kHz. Dendritic morphological parameters, biophysical parameters of the dendrite and the synaptic inputs  
14 and tonotopic parameters of the inputs all affected the impact of dendritic synapses. This suggested the  
15 possibility of fine tuning of the effect the dendritic inputs have for different coding demands or input  
16 frequency ranges. Excitatory dendritic inputs modulate the processing of the main input and are thus a  
17 plausible mechanism for the improvement of temporal precision in spherical bushy cells.

18

## 19 **Introduction**

20 Spherical bushy cells (SBC) are monaural neurons in the anteroventral part of the mammalian cochlear  
21 nucleus (Bazwinsky et al., 2008). They receive narrow-band input (Blackburn and Sachs, 1989) from the  
22 auditory nerve (AN) via the endbulb of Held axosomatic terminals (Ryugo and Parks, 2003; Felmy and  
23 Künzel, 2014) and project their axons to binaural nuclei in the sound localization circuitry of the superior  
24 olivary nucleus (Cant and Benson, 2003). SBC maintain the temporal code contained in AN action potentials  
25 and have been reported to improve the precision of phase locking (Joris et al., 1994a,b; Young and Sachs,  
26 2008; Kuenzel et al., 2011; Keine and Rübsamen, 2015; Wei et al., 2017) sometimes beyond what individual  
27 AN fibers are capable of (Versteegh et al., 2011). The mechanism for this is well understood in the case of  
28 numerous phase-locked subthreshold inputs: several events have to precisely coincide to cause an action  
29 potential (Rothman et al., 1993; Xu-Friedman and Regehr, 2005a) which causes a narrower distribution of  
30 output phase angles. This seemed to be the case for SBC with high characteristic frequencies and for  
31 globular bushy cells (Spirou et al., 2005). Enhancement of temporal precision by the coincidence of  
32 numerous inputs has also been successfully demonstrated in computer simulations of SBC (Rothman et al.,  
33 1993; Rothman and Young, 1996). For SBC that receive only a small number of supra-threshold inputs (Cao  
34 and Oertel, 2010) a different mechanism was proposed: here only the first active suprathreshold input caused

35 an output action potential (Xu-Friedman and Regehr, 2005b). This biased and sharpened the distribution of  
36 temporal positions contained in the output towards early suprathreshold events. Given that endbulb of Held  
37 terminals were reported to be much less effective in vivo (Borst, 2010; Kuenzel *et al.*, 2011), inhibitory  
38 inputs to SBC (Kuenzel *et al.*, 2011; Campagnola and Manis, 2014; Nerlich *et al.*, 2014; Keine and  
39 Rübtsamen, 2015; Kuenzel *et al.*, 2015; Keine *et al.*, 2016) also play a major role in both scenarios by  
40 dynamically setting the action potential threshold.

41 Interestingly, in a subset of low-frequency SBC that often receive only a single, very strong endbulb of  
42 Held input, enhancement of temporal precision was also observed (Smith *et al.*, 1993; Joris *et al.*, 1994a;  
43 Kuenzel *et al.*, 2011). This finding cannot be explained by the mechanisms discussed above. This conundrum  
44 was termed the spherical cell puzzle (Joris and Smith, 2008). What is the source of additional information for  
45 these low-frequency, single-input SBC? First it has to be noted that even these low-frequency SBC do not  
46 only receive a single synaptic input. In fact a wide array of smaller inputs from various sources converge on  
47 the dendritic structures of SBC (Kuenzel, 2019), some being AN fibers (Gómez-Nieto and Rubio, 2009) of  
48 the same characteristic frequency as the endbulb input. We hypothesize that these phase-coupled weak inputs  
49 act as a “hidden” augmentation to the main input and represent the extra information needed to enhance the  
50 temporal precision in these neurons. In-vivo studies by Keine and Rübtsamen (2015) and Kuenzel *et al.*  
51 (2011) indeed showed that the strongest EPSP of a single endbulb showed best timing. This was also a  
52 required feature for the increase in temporal precision in one of our prior modeling studies (Kuenzel *et al.*,  
53 2015). Unfortunately there is little concrete physiological information available on small excitatory dendritic  
54 inputs (Cao and Oertel, 2010) and the dendritic properties of SBC (Oertel *et al.*, 2008). Based on  
55 morphological data it is assumed that dendritic AN inputs to SBC are numerous but weak, bouton-like  
56 contacts (Gómez-Nieto and Rubio, 2009). At least some were reported to be additional axodendritic  
57 connections of axosomatic AN terminals (Ostapoff and Morest, 1991; Ryugo and Sento, 1991; Gómez-Nieto  
58 and Rubio, 2009).

59 We therefore designed the following modeling study with two objectives in mind: first we wanted to  
60 explore whether and how a number of phase-locked but weak dendritic inputs can shape the input-output  
61 relation of the main axosomatic input, especially with regard to temporal coding. And second, we sought to  
62 deduce and discuss the range of physiological parameters of both the dendritic inputs and the dendritic  
63 structures of SBC at which phase-locked dendritic inputs could help temporal processing. To achieve these  
64 goals we developed a compartment model of SBC closely based on physiological data and attached either a  
65 stylized or a realistic 3D-dendritic structure. We explored what the impact of dendritic inputs was on SBC  
66 subthreshold membrane potentials as well as their interaction with the endbulb of Held terminal. Our results  
67 indicated that small phase-locked dendritic inputs can improve the encoding of temporal information  
68 contained in the main axosomatic input and thus represent one likely piece of the spherical cell puzzle.

69

## 70 **Material and Methods**

### 71 *Staining and 3D-reconstruction of gerbil spherical bushy cells*

72 For N = 18 spherical bushy cells filled with biocytin during whole-cell recordings in acute gerbil brain  
73 slices we obtained morphological data. Recording techniques and the staining approach was described in  
74 detail elsewhere before (Goyer et al., 2016; Gillet et al., 2018; Gillet et al., 2020). Briefly, cells were  
75 recovered post-hoc by fixation of the slices in 4 % paraformaldehyde in 0.1 M phosphate buffer overnight.  
76 After washing with buffered saline solution containing 0.3 % Triton X-100, slices were incubated with  
77 Alexa-streptavidin conjugate (Thermo Fischer Scientific) diluted 1:800 in 0.1 M phosphate buffer containing  
78 0.1 % Triton X-100 and 1 % bovine serum albumine for 3 h at RT. Washed (TRIS-buffered saline containing  
79 0.3 % Triton X-100) slices were then mounted in Fluoprep medium (bioMerieux) surrounded by a spacer  
80 frame (240  $\mu$ m adhesive tapes; Grace Bio-Labs) between two glass coverslips.

81 SBC were visualized with a confocal laser-scanning microscope (Leica TCS SP2, Leica Microsystems) at  
82 high resolution. The number of images per stack was adjusted to assure the z-resolution was  $\leq 0.5 \mu$ m.  
83 Cellular structures in these confocal stacks were reconstructed in 3D using the “Simple Neurite Tracer”  
84 plugin (Longair et al., 2011) for FIJI/ImageJ (Schindelin et al., 2012). Besides a description of each dendritic  
85 section as a hierarchic list of paths defined by points in x-, y- and z-coordinates, this included a diameter d  
86 for every coordinate. The diameter of each segment was derived by volume fitting the dendritic segment in  
87 the confocal image as described in Longair et al. (2011). We defined an arbitrary minimal diameter of 1  $\mu$ m  
88 for dendritic segments. This was done because the volume fitting procedure, being based on the local  
89 fluorescence intensity of the image, produced numerous segments with diameters close to 0  $\mu$ m. Somatic and  
90 axonal structures were reconstructed but not further analyzed. Dendritic structures were analyzed by  
91 counting the intersects of dendritic segments with spheres of increasing radii in 3D space (Sholl, 1953;  
92 Malinowski et al., 2019). Data describing both the 3D-shape as well as the identity and connectivity of all  
93 dendritic segments were exported from the FIJI-plugin and imported into our custom Python model code (see  
94 below).

95

### 96 *Compartment model of gerbil spherical bushy cells*

97 Using NEURON (version 7.6.2) as a module in Python 2.7 running in Ubuntu Linux Server 18.04 we  
98 created a compartment model of gerbil SBC as previously published (Nerlich et al., 2014; Kuenzel et al.,  
99 2015; Goyer et al., 2016). The python code necessary to generate the figures of this manuscript is available  
100 for inspection as a git repository at <https://github.com/thkupy/sbcnrnpy>. The model consisted of a somatic  
101 section, to which an axon model (consisting of an initial segment and a stretch of passive axon representing  
102 the first internode) and either a stylized or realistic dendritic representation was attached. The stylized  
103 dendrite consisted of a proximal dendrite, to which a distal dendrite was attached (resulting in a “ball-and-

104 stick with axon” model). In these experiments we defined classical geometry for these sections in NEURON.  
105 For the experiment using the realistic dendritic representation we created and connected appropriate numbers  
106 of sections based on our reconstructed SBC morphology and defined the geometry of each section using the  
107 pt3d-notation of NEURON. In the realistic dendrite model the dendritic path which connected to the soma  
108 section was defined as the proximal dendrite, all other dendritic sections were called distal. The geometry of  
109 axon, soma and stylized dendrite and the biophysical parameters of all sections can be found in Table 1. The  
110 Nernst- and reversal-potentials were:  $E_{Na} = 50$  mV,  $E_K = -70$  mV,  $E_H = -43$  mV,  $E_{leak} = -65$  mV. Axial  
111 resistance of all segments was set to  $150 \Omega \cdot \text{cm}$ . All simulations were calculated at fixed temporal resolution  
112 of  $dt = 10 \mu\text{s}$ , for a temperature of  $35^\circ\text{C}$ .

113 We connected two classes of synaptic models to both the stylized and realistic SBC model. Dendritic  
114 synapses were per default modelled as  $N = 16$  simple point synapses (*ExpSyn*) with a default synaptic  
115 conductance of  $g_{syn} = 0.5$  nS, which were activated at specific times representing AN input events with the  
116 *NetCon* and *NetStim* mechanisms of NEURON. In the stylized model dendritic synapses were placed on the  
117 distal dendrite section only, with even spacing (spanning 5 % to 95 % of the section length). In the realistic  
118 dendrite model the dendritic connections were randomly chosen to predominantly (66 %) connect to the  
119 distal dendritic sections. Random dendritic positions were saved and reused for every simulation run  
120 (although a new random placement for every repetition produced, on average, the same results). Furthermore  
121 we attached a large conductance point source (modeled as a *gclamp* mechanism in NEURON) to the soma  
122 (at 50 % of the soma length) as a representation of the endbulb of Held input. Conductance traces for the  
123 endbulb of Held input were generated as described before (Nerlich et al., 2014; Kuenzel et al., 2015) to  
124 closely match the behavior of in-vivo endbulb of Held recordings. The synaptic conductance for the endbulb  
125 input was randomly varied for every input event (mean:  $55 \text{ nS} \pm 11 \text{ nS}$ ). The reversal potential of all synapse  
126 models was set to  $E_{rev} = 0$  mV.

127 An overview of the model geometry and connectivity for the stylized dendrite model is shown in Fig. 1.

128

### 129 *Auditory nerve inputs*

130 We modeled all inputs to the SBC model as sound driven auditory nerve spike arrival times generated by  
131 the well-known Zilany-model (Zilany et al., 2009; Zilany et al., 2014). All simulated sound responses were  
132 calculated at a temporal resolution of  $10 \mu\text{s}$  (100 kHz) for medium spontaneous range fibers and the species-  
133 setting "cat". Characteristic frequencies (CF) below 2.5 kHz were used in our simulations. For parallel  
134 activation of the dendritic and somatic synapse models we calculated AN sound driven responses as  
135 statistically independent AN fibers of the same CF. We used the Python module *cochlea* (Rudnicki et al.,  
136 2015) as a convenient wrapper for the Zilany-model.

137

138 *Data analysis and statistics*

139 If not stated otherwise all results given in the paper are expressed as mean  $\pm$  1 standard deviation. Spike  
140 times in the simulated SBC membrane voltage responses were detected by thresholding the first derivative of  
141 the membrane potential, using the rapid falling flanks as distinct features of action potentials. The time of  
142 peak voltage of the action potential was then used as the spike time for further analysis. Failed endbulb of  
143 Held transmission was detected by the absence of an output spike in a time-window of 1 ms after a known  
144 endbulb input event. We calculated the precision of phase locking as the vector strength (Goldberg and  
145 Brown, 1969) of SBC output spike times. A confidence level of  $p < 0.001$  (Rayleigh test) was used as a  
146 criterion for significance of phase locking (Fisher, 1993). Values of vector strength that failed the rayleigh  
147 criterion were set to 0. All data analysis and visualization was performed using the python modules  
148 *matplotlib* and *numpy*. For visualizing data as 2D contour-plots (*contourf*) mild smoothing was routinely  
149 applied to the data using a gaussian filter ( $\sigma = 0.5$ ).

150

151 **Results**

152 *Phase-locked excitatory dendritic inputs cause subthreshold membrane potential oscillations*

153 We first analyzed the effect of small excitatory inputs to the model SBC dendrite without any main  
154 endbulb input (Fig. 1A). Dendritic inputs were driven by independent auditory nerve spike trains calculated  
155 for the same characteristic frequency (Fig. 1B). At the given inputs frequency and level used in this sparse  
156 low-frequency example (125 Hz, 60 dB SPL) a simulated AN fiber with a characteristic frequency (CF) of  
157 250 Hz responded with  $55 \pm 16$  AP/s and had a vector strength of  $0.78 \pm 0.1$ .

158 Activity of a single, weak ( $g_{\text{syn}} = 0.5$  nS) dendritic input elicited small (0.41 mV) EPSP at the soma  
159 (Fig. 1C). The combined activity of a higher number ( $N = 32$ ,  $g_{\text{total\_syn}} = 16$  nS) of dendritic inputs summated  
160 to sharp, albeit subthreshold, fluctuations of the membrane potential at the stimulus frequency (Fig. 1D). The  
161 amplitude of these fluctuations was 5.4 mV in this example. Furthermore, in addition to the phase-locked  
162 oscillations the summing dendritic EPSP also caused a small tonic depolarization of the resting membrane  
163 potential ( $V_{\text{rest}} = -64.5$  mV without inputs,  $V_{\text{rest}} = -62.9$  mV with inputs) during the simulated stimulus  
164 presentation. In the following experiments we wanted to better understand how the properties of the dendritic  
165 tree and the dendritic synaptic inputs shaped these membrane potential responses. Since actual physiological  
166 parameters of the SBC dendrite (ionic conductances, number and conductance of dendritic synapses etc.) are  
167 not readily available, we varied several parameters over a plausible range to derive their impact.

168 For this we averaged the SBC membrane potential over the stimulus cycle and quantified the mean  
169 membrane potential and the amount of membrane potential modulation. Both parameters strongly depended  
170 on the length (Fig. 2A1-B2) and the diameter (Fig. 2C1-D2) of the primary dendrite. While  $V_m$

171 depolarization and modulation fell exponentially with dendritic length (Fig. 2A1, A2), depolarization and  
172 modulation were maximal for a dendritic diameter of 3.3  $\mu\text{m}$  (Fig. 2C1,C2) and were reduced for both  
173 smaller and wider diameters. The latter can be mostly explained by the increased leak conductance in the  
174 longer dendritic segment. To illustrate this point we again calculated these simulations for the different  
175 dendritic morphologies but kept the total leak conductance of the dendritic segment fixed (dashed lines in  
176 Fig. 2A1-C2). In this condition,  $V_m$  modulation still steeply drops with increasing length (Fig. 2A2) and  
177 decreasing diameters below about 3  $\mu\text{m}$  (Fig. 2D2). Over all (Fig. 2E) our model showed that the effects of  
178 the dendritic inputs on  $V_m$  depolarization (Fig. 2E1) and  $V_m$  modulation (Fig. 2E2) mostly depended on the  
179 length and, given a minimum value of about 3  $\mu\text{m}$ , to a lesser degree on the diameter of the primary dendrite.  
180 We concluded that in order to maximize the effect of the phase-locked dendritic inputs, primary dendrites of  
181 SBC should be as short as possible and thicker than 3  $\mu\text{m}$ .

182 Very little is known about the number of dendritic auditory nerve terminals of SBC (Gómez-Nieto and  
183 Rubio, 2009), and there is no good data on the synaptic conductance of these contacts (Cao and Oertel, 2010;  
184 maybe see). We thus wanted to explore the effect of a wide range of synapse numbers and total synaptic  
185 conductance on the membrane potential of the SBC (Fig. 3). We found that both the tonic depolarization and  
186 the membrane potential modulation did not depend on the actual number of inputs, above a low number of  
187 inputs (Fig. 3A1-B2). The depolarized resting membrane potential (RMP) converges to a value of -61.6 mV  
188 for  $N > 15$  inputs, the RMP modulation reaches 3.84 mV above  $N > 23$  inputs. In contrast to this, both the  
189 tonic depolarization and the RMP modulation monotonically increased with total synaptic conductance  
190 (Fig. 3C1-D2). Over a wide range of parameters (Fig. 3E), the influence of phase-locked synaptic inputs on  
191 SBC membrane potential almost exclusively depended on the total conductance. Only for very low numbers  
192 of inputs ( $N < 8$ ) at high total conductances above 37 nS (Fig. 3E3) action potentials were elicited by  
193 dendritic inputs without endbulb of Held input. We concluded that a wide combination of the number and  
194 total conductance of dendritic auditory nerve terminals will only act on the subthreshold membrane potential  
195 of the SBC rather than directly cause output action potentials.

196 Next, we wanted to explore the impact of the relation between the input cycle duration and the decay time-  
197 constant of the dendritic synaptic conductance on the SBC membrane potential (Fig. 4). One can assume that  
198 the synaptic currents elicited by glutamatergic auditory nerve terminals in the dendrites of SBC will have  
199 kinetics comparable to endbulb glutamatergic currents, but direct measurements are unavailable.  
200 Furthermore, it is obvious that the cycle duration of the phase-locked inputs will have a strong influence on  
201 the effect of summing synaptic potentials. With increasing decay time constant in response to 200 Hz input  
202 rate, the tonic depolarization of the RMP strongly increased (Fig. 4A1,B), as the synaptic events summated  
203 more efficiently. At the default value of  $\tau_{\text{decay}} = 2$  ms  $V_m$  was -61.5 mV, at  $\tau_{\text{decay}} = 20$  ms  $V_m$  was as  
204 depolarized as -53.3 mV. The amplitude of the RMP modulation, however, with increasing  $\tau_{\text{decay}}$  rose steeply  
205 at first to maximum of 3.87 mV at  $\tau_{\text{decay}} = 1.77$  ms (Fig. 4A2,B). RMP modulation then gradually declined

206 with increasing  $\tau_{\text{decay}}$  to a value of 0.94 mV at the highest  $\tau_{\text{decay}}$  tested (20 ms). Interestingly, due to the phase-  
207 locked nature of the inputs there was a small modulation at the frequency of the simulated sound stimulus  
208 visible in the membrane potential, even at these very long synaptic decay time-constants (Fig. 4B). With  
209 increasing cycle duration of the input at a fixed  $\tau_{\text{decay}} = 2$  ms, the tonic  $V_m$  depolarization slightly reduced  
210 (Fig. 4C1,D) from  $V_m = -60.5$  mV (interval = 2 ms / 500 Hz) to  $V_m = -62.2$  mV (at IPI = 7.5 ms / 133 Hz).  
211 The amplitude of  $V_m$  modulation converged to a value of 4.2 mV (at IPI = 7.5 ms / 133 Hz), starting from  
212 1.4 mV (at IPI = 7.5 ms / 133 Hz). When we varied both the  $\tau_{\text{decay}}$  and the IPI of the inputs (Fig. 4E1,E2) it  
213 became obvious that the contour lines in the 2d-plot ran mostly diagonally. This means that in order to ensure  
214 a constant amount of  $V_m$  depolarization (Fig. 4E1) or amplitude of  $V_m$  modulation (Fig. 4E2) over a wide  
215 range of mean IPI, the  $\tau_{\text{decay}}$  of the inputs must be increased or decreased in accordance with the IPI. We thus  
216 concluded that, in order to cause both significant tonic and modulated effects on RMP, the dendritic auditory  
217 nerve terminals should have rapid decay time-constants of  $\tau_{\text{decay}} < 5$  ms. Furthermore the  $\tau_{\text{decay}}$  of the dendritic  
218 synaptic inputs could provide a parameter to optimally tune the dendritic inputs to a specific range of input  
219 frequencies.

220 It was reported (Oertel et al., 2008) that primary dendrites of SBC express both low-voltage activated  
221 potassium ( $g_{\text{KLT}}$ ) and hyperpolarization-activated cation conductance ( $g_{\text{H}}$ ). However, information about the  
222 actual density of either these voltage activated conductances or passive leak conductance ( $g_{\text{leak}}$ ) of the  
223 dendritic compartment were not available. We thus varied  $g_{\text{KLT}}$ ,  $g_{\text{H}}$  and  $g_{\text{leak}}$  over a range of plausible values  
224 and evaluated the impact of these parameters on the  $V_m$  depolarization and modulation by dendritic inputs  
225 (Figure 5). We found, that the amount of tonic  $V_m$  depolarization is reduced with increasing  $g_{\text{KLT}}$   
226 (Fig. 5A1,B), while the amplitude of  $V_m$  modulation was largely unaffected (Fig. 5A2,B). In contrast to this,  
227 tonic depolarization slightly increased with increasing  $g_{\text{H}}$  (Fig. 5C1,D) without strong effects on the  $V_m$   
228 modulation (Fig. 5C2,D). Thus the voltage-activated conductances that are coexpressed in SBC dendrites  
229 have opposing effects on the tonic depolarization but both leave the rapid, cycle-by-cycle modulation mostly  
230 unaffected. In contrast to this, increasing the passive leak conductance shunts both the tonic  $V_m$   
231 depolarization (Fig. 5E1,F) and the  $V_m$  modulation (Fig. 5E2,F). Varying both  $g_{\text{KLT}}$  and  $g_{\text{H}}$  revealed  
232 (Fig. 5G1) that these conductances linearly counteracted each other in affecting the  $V_m$  depolarization. Thus,  
233 when both conductances increased roughly in a 2:1 ratio, the amount of  $V_m$  depolarization remained constant.  
234 On the other hand,  $g_{\text{KLT}}$  and  $g_{\text{H}}$  both had a small reducing effect on the amplitude of  $V_m$  modulation. This  
235 effect grew additively when both conductances increased (Fig. 5G2).

236 Overall our model results agree with the idea that SBC dendrites could be finely tuned to either emphasize  
237 the overall input level (tonic  $V_m$  depolarization) or the phase-locked nature (dynamic  $V_m$  modulation) of the  
238 dendritic synaptic inputs by the relative strength of  $g_{\text{KLT}}$ ,  $g_{\text{H}}$  and  $g_{\text{leak}}$  expressed in the dendritic compartment.

239



240 *Subthreshold membrane potential oscillations caused by dendritic inputs increase spike probability and*  
241 *timing precision of main endbulb inputs*

242 Our model showed both a tonic and dynamic influence of dendritic inputs on subthreshold SBC  $V_m$ . In the  
243 next step we assessed how the dendritic inputs could interact with the endbulb of Held axosomatic input. We  
244 thus modified the model to include a strong, somatically localized excitatory synaptic model that was driven  
245 by independent auditory nerve spike trains calculated for the same characteristic frequency as for the  
246 dendritic synapses (Fig. 6A). In the example shown in Fig. 6 (CF = 1000 Hz, @1000 Hz / 65 dB SPL) this  
247 resulted in simulated AN activity of 211 events/s driven rate and 55 events/s spontaneous rate. No short-term  
248 synaptic dynamics were simulated, however a stochastic variation of the endbulb EPSC amplitudes was  
249 implemented. This was shown before (Kuenzel et al., 2011; Nerlich et al., 2014; Kuenzel et al., 2015) to fit  
250 the in-vivo properties of this synapse well. The model SBC, without dendritic inputs, produced in this  
251 example a driven response of 180 AP/s and 50 AP/s spontaneous activity (Fig. 6B). Since the distribution of  
252 EPSC amplitudes ( $55 \pm 11$  nS) partially straddles the AP threshold of the model SBC, a moderate amount of  
253 failures occurred during simulated sound stimuli responses (31 failures/s) and during spontaneous activity  
254 (5 failures/s), as was reported for SBC from in vivo studies (Kuenzel et al., 2011; Keine et al., 2017). The  
255 auditory nerve inputs and therefore the output spikes of the model SBC showed robust phase locking  
256 (Fig. 6C) to the input fine-structure (AN inputs: VS = 0.80; SBC output without dendritic synapses:  
257 VS = 0.71). Interaction of the axosomatic input with dendritic inputs resulted in a higher output rate of the  
258 SBC model of 198 AP/s (Fig. 6D). The higher output rate was caused by a lower driven failure rate of only  
259 13 failures/s. Spontaneous failures were identical for the two example conditions. Furthermore, the resulting  
260 output spikes were phase-locked more precisely to the input frequency (Fig. 6E), now showing a vector  
261 strength of 0.75. The improved temporal precision was accompanied by an advance of the preferred phase  
262 ( $\phi = 0.23$  cycles vs.  $\phi = 0.28$  cycles). The effects of dendritic inputs on temporal precision will be explored  
263 in greater detail in the following section. Initially, we elucidated the mechanism by which the interaction of  
264 dendritic and somatic inputs increased the output spike rate of the model SBC.

265 For this we simulated single endbulb events of varying EPSC amplitude at specific fixed positions on the  
266 stimulus cycle, in order to estimate the conductance threshold at different phases of the dynamic  $V_m$   
267 modulation caused by the dendritic inputs (Fig. 6F). Unsurprisingly, in the condition without dendritic inputs  
268 (Fig. 6F, upper row) the phase at which endbulb inputs occurred had no effect on the conductance threshold.  
269 Below  $g_{EoH} = 37$  nS no action potentials were elicited by the endbulb events regardless of phase. In the  
270 condition with dendritic inputs events that occurred in the rising phase had a smaller conductance threshold  
271 ( $g_{EoH} = 31$  nS) than events that occurred later in the cycle (Fig. 6F, middle row). Furthermore, on average the  
272 conductance to elicit an SBC action potential was lower in the dendritic input condition ( $g_{EoH} = 34$  nS). We  
273 then quantified the results from the exemplary simulations shown in Fig. 6F by measuring the amplitude and  
274 delay of AP for a number of different EPSC amplitudes and phases (Fig. 6G). It was clear that in the model

275 without dendritic inputs endbulb conductance threshold was not phase dependent (red line in Fig. 6G1/G3)  
276 and AP amplitude (Fig. 6G1) and delay (Fig. 6G3) only depended on  $g_{EoH}$ . In the condition with dendritic  
277 inputs the phase dependence of the conductance threshold was evident (red line in Fig. 6G2/G4) resulting in  
278 a phase and  $g_{EoH}$  dependence of AP amplitude (Fig. 6G2) and delay (Fig. 6G4). Furthermore the dependence  
279 of AP delay on  $g_{EoH}$  at a given phase of the cycle was steeper, thus resulting in overall shorter AP delays. This  
280 explained the advance of preferred phase we observed (Fig. 6E). Taken together the quantification presented  
281 here suggested that dendritic inputs both tonically and dynamically reduced the conductance threshold of the  
282 endbulb, resulting in a phase-dependent improvement of the endbulb transmission efficacy.

283

#### 284 *Frequency tuning of the interaction of dendritic inputs and main endbulb inputs*

285 Since we found that the interaction of the dendritic inputs with the main endbulb inputs had an effect on  
286 temporal processing of the SBC model, we simulated auditory responses over a wide range of input stimulus  
287 frequencies and constructed frequency-response areas for the SBC model with and without dendritic inputs.  
288 As mentioned before, simulations were run with identical random seeds for each stimulus condition, to  
289 isolate the effect of the added dendritic synaptic conductance in the results. Figure 7A/B shows the primary-  
290 like response of the SBC model without and with the dendritic inputs. The overall shape and monotonically  
291 increasing characteristic of the response was unchanged. This was clearly evident by the 80 AP/s contour  
292 demarcating the responses clearly above spontaneous firing. However, the maximal response was increased  
293 in the condition with dendritic inputs, as was best shown by the larger extent of the area demarcated by the  
294 170 AP/s contour (Fig. 7A/B). We plotted the difference between both conditions in the same coordinate  
295 system (Fig. 7C). It became obvious that the strongest increase in response rate caused by the dendritic  
296 inputs was at and below the CF of the simulated SBC. When we compared the effects of dendritic inputs on  
297 temporal aspects of the response, a different picture emerged (Fig. 7D-I). Precision of phase locking,  
298 expressed as VS and further illustrated in Fig. 7D/E with a VS = 0.6 contour, increased for frequencies at and  
299 above CF but remained largely unaffected in the low-frequency tail of the response (Fig. 7F). Indeed, the  
300 largest improvements of temporal precision occurred within half an octave above the CF of the SBC for  
301 higher sound pressure levels (Fig. 7F). The accompanying advance of the preferred phase (Fig. 7G-I) showed  
302 a similar frequency dependence: it was greatest for frequencies at and above CF and weak below CF.

303 We concluded that the interaction of the main endbulb input with phase-locked dendritic inputs shaped the  
304 output rate and precision of the model SBC in a complex, frequency-dependent manner. At CF and for  
305 frequencies below that, the number of well-timed output AP the SBC model generates was clearly increased.  
306 This could have a significant effect on temporal processing in binaural target areas of SBC in the auditory  
307 brainstem. The benefit of dendritic inputs for temporal precision was strongest for higher frequencies. In  
308 these stimulus conditions the temporal precision of the SBC response, both in the model and in real

309 recordings (Kuenzel et al., 2011), started to deteriorate. Thus, in the model with a single endbulb and no  
310 inhibitory inputs, the dendritic inputs ameliorated the deterioration of temporal coding for higher  
311 frequencies.

312

### 313 *Influence of dendritic properties on the efficacy of dendritic inputs to SBC*

314 In the following section we wanted to investigate the influence of morphological and physiological  
315 parameters of the SBC dendrite on the effect the interaction of dendritic and main endbulb inputs had. For  
316 this we again simulated responses with and without dendritic inputs similar to the experiment shown in  
317 Fig. 7. In the following however, we only show the difference (cf. Fig. 7C,F,I) in output rate, VS and  
318 preferred phase between the two conditions plotted against the parameters we varied.

319 We first varied morphological parameters of the SBC model dendrite (Fig. 8A1). It became evident, that  
320 best increase in output rates was achieved for dendrites above 3.3 $\mu\text{m}$  diameter and between 50 and 200  $\mu\text{m}$ .  
321 With increasing dendrite diameters, primary dendrites had to be shorter to achieve comparable improvement  
322 in output spike rates. In fact, the highest difference in output rate between the conditions without and with  
323 dendritic inputs (52 Hz) was achieved for a dendrite of  $L = 81 \mu\text{m}$  and  $D = 6.2 \mu\text{m}$ . However, a variety of  
324 parameter combinations in the range of  $3.3 \mu\text{m} < D < 5.5 \mu\text{m}$  and  $50 \mu\text{m} < L < 200 \mu\text{m}$  caused robust  
325 increase in output spiking. Best improvements of temporal precision were generally found for short dendrites  
326 below  $L = 100 \mu\text{m}$  (Fig. 8A2). Although the best improvement of vector strength was found for a dendrite of  
327  $L = 33 \mu\text{m}$  and  $D = 9.1 \mu\text{m}$ , the improvement of temporal precision was only weakly dependent on dendrite  
328 diameter for short dendrites. In a range of diameters between  $2.7 \mu\text{m} < D < 6 \mu\text{m}$  a robust improvement of  
329 phase-locking precision was observed for dendrites below  $L = 100 \mu\text{m}$ . Inputs to dendrites that were  
330 narrower or wider than this range could also improve temporal precision, however in these cases the length  
331 of the dendrite was more restrictive. Interestingly, a distinct subset of morphological parameters emerged  
332 where dendritic inputs actually caused reduction of phase-locking precision. Inputs to dendrites of  
333  $L = 291 \mu\text{m}$  and  $D = 5.3 \mu\text{m}$  reduced the vector strength by -0.12. The results for the phase advance  
334 (Fig. 8A3) largely followed those of the improvement of vector strength. Here again, inputs to a short, thick  
335 dendrite of  $L = 113 \mu\text{m}$  and  $D = 7.3 \mu\text{m}$  caused the largest phase advance of -0.11 cycles. We conclude, that  
336 morphological parameters well within the estimated physiological range for bushy cell dendrites allowed  
337 dendritic inputs to cause a robust increase in output spiking. However, the effect of improvement of phase-  
338 locking precision was limited to short dendrites below about 100 $\mu\text{m}$ .

339 We next tested how the number and total conductance of dendritic synapses influenced the interaction of  
340 main endbulb and dendritic inputs (Fig. 8B). As expected from the subthreshold analysis (Fig. 3) the number  
341  $N$  of dendritic synapses did not effect the outcome of the simulation for  $N > 10$  inputs. Instead, the result  
342 predominantly depended on the total dendritic conductance. For the improvement of output rate (Fig. 8B1)

343 an optimal range of conductance was evident: The best improvement was seen for  $N = 91$  synapses with a  
344 total conductance of  $g_{\text{syn}} = 30$  nS. However, above a conductance of  $g_{\text{syn}} = 44.7 \pm 0.7$  nS (average for all  
345 conditions with  $N > 3$  inputs) the effect started to reverse. Here, output spike rate was actually decreased by  
346 the interaction with dendritic inputs, to a point of massive rate reduction (-155 Hz for  $N = 115$  synapses with  
347  $g_{\text{syn}} = 64$ nS). The temporal precision monotonically increased with increasing  $g_{\text{syn}}$  (Fig. 8B2) and was robust  
348 over a very wide range of synaptic conductances. The best (significant) vector strength improvement was  
349 found for  $N = 82$  inputs with  $g_{\text{syn}} = 64$  nS. Thus the few remaining output spikes in conditions of very high  
350 dendritic conductance were best locked to the stimulus phase. However, it must be noted that for these  
351 experiments at least 5 seconds of spiking activity was simulated per condition and therefore even in  
352 conditions of massive rate reduction a sufficient number of well-timed AP could easily be collected. This is  
353 most likely not a feasible mode of phase encoding in the brain. We thus concluded that we should reject the  
354 conditions that caused massive rate reductions as unrealistic, even if best improvement of temporal precision  
355 resulted from these. This notion is supported by the quantification of the phase advance (Fig. 8B3), which  
356 was maximal only for a more limited range of total dendritic conductances between roughly 20 nS and  
357 35 nS. The conclusion from the experiments shown in Fig. 8B was, that the actual number of dendritic inputs  
358 did not matter for the beneficial effects these inputs have in the interaction with the main endbulb input,  
359 beyond a very low number at least. Furthermore, the total dendritic synaptic conductance had to be below  
360 35 nS to generate effects that did not overtly divert from realistic behavior of SBC.

361 We wanted to investigate the hypothesis that dendritic  $g_{\text{KLT}}$  might tune the effect of interaction of dendritic  
362 inputs with the main endbulb to a specific range of characteristic input frequencies (cf. Fig. 5). For this we  
363 varied the dendritic low-threshold potassium conductance  $g_{\text{KLT}}$  and the CF of the model and observed effects  
364 for stimulation at CF (Fig. 8C). Improvement of output rate upon stimulation at CF (Fig. 8C1) appeared  
365 mostly to depend on CF. Highest increases were found for CFs between 500 Hz and 1000 Hz (best: +23 Hz  
366 output rate at 647 Hz, 18 nS  $g_{\text{KLTdend}}$ ). Nevertheless output rate increased robustly over all CFs tested, except  
367 below 250 Hz. However, contours on the flanks of the area of best improvement were skewed. Hence, output  
368 rate improvements in this area both depended on CF and, to a lesser degree, also on  $g_{\text{KLTdend}}$ . Thus, in order to  
369 attain a consistent effect on output rate over a range of different CFs,  $g_{\text{KLTdend}}$  had to increase with increasing  
370 CF (on the high-frequency side). As an example we quantified here the slope for the +18 Hz output rate  
371 contour by linear regression: on the high frequency side,  $g_{\text{KLTdend}}$  needed to increase by 0.022 nS / Hz CF for a  
372 constant output rate improvement. On the low-frequency side (below 500 Hz) contours were skewed in the  
373 other direction, thus  $g_{\text{KLTdend}}$  needed to decrease with increasing CF at a steep slope of -0.19 nS / Hz CF for a  
374 constant output rate improvement. Results were comparable for temporal precision (Fig. 8C2,3). Indeed,  
375 improvement of vector strength and the accompanying phase advance mostly depended on CF. At CFs below  
376 about 750 Hz increase in VS was low or non-existent but was robustly present above this CF range. Again,  
377 an area of best improvement of VS could be identified for higher CFs between 1750 and 2250 Hz (Fig. 8C2),

378 where phase advance was especially pronounced (Fig. 8C3). As was the case for the output rate  
379 improvement, contours of equal VS improvement and phase advance are skewed for higher CFs  
380 (Fig. 8C2,3). Thus,  $g_{KLTdend}$  in these cases needed to increase at 0.07 nS / Hz CF (quantified for the +0.06 VS  
381 contour as an example) in order to maintain a constant improvement of VS or phase advance. Our model  
382 results therefore supported the hypothesis that dendritic  $g_{KLT}$  could indeed act as a parameter to fine-tune  
383 effects of the interaction of dendritic and main endbulb inputs in SBC to a specific range of characteristic  
384 input frequencies.

385 In order to quantify the frequency-dependency of the effects of the interaction of dendritic and axosomatic  
386 inputs we varied both CF and input frequencies (Fig. 9A). As was already evident from the frequency  
387 response area of a CF = 1500 Hz unit we showed in Fig. 7, best improvement of output rate was  
388 predominantly found at frequencies below CF (Fig. 9A1). Indeed, contours of equal output rate improvement  
389 are skewed diagonally. As an example we quantified the slope of the  $\Delta AP = 18$  AP/s contour by linear  
390 regression. We found a 0.58 kHz/kHz slope and an y-intercept of 0.35 kHz ( $y = 0.58x + 0.35$ ). This means,  
391 that for CF below about 750 Hz the frequency of best improvement was largely at CF. For higher CF the  
392 frequency of best improvement increasingly moved away from CF into the low-frequency tail. Although the  
393 highest improvement of AP output rate was found in the low frequency area (587 Hz CF, 587 Hz input  
394 frequency,  $\Delta AP = 25.7$  AP/s) improvement of output rate was robust for a wide range of CF and input  
395 frequencies. Improvement of temporal precision (and the accompanying phase advance) followed a different  
396 pattern of frequency-dependency (Fig. 9A2,3). Regardless of CF, no increase of vector strength (and  
397 accordingly, very little phase advance) occurred for input frequencies below 500 Hz. For higher input  
398 frequencies above about 700 Hz units of all CF showed robust increase of vector strength. This was of course  
399 limited by the high-frequency flank in the tuning of the auditory nerve fibers for units of low CF. Beyond  
400 that, no further clear pattern of frequency dependency emerged. Maximal improvement of temporal precision  
401 (and phase advance) seemed to occur at CF and input frequencies of around 2000 Hz and above (max VS  
402 improvement: +0.07 for CF = 1872 Hz, 2271 Hz input frequency). Overall we concluded, that the effects on  
403 output rate and temporal precision had different but overlapping patterns of frequency-dependence.

404 Last we hypothesized, that the frequency-dependence of the effects of the interaction of dendritic and  
405 axosomatic inputs might be governed by the kinetics of the dendritic synaptic inputs in this model. We  
406 assumed, that these synapses should have rapid kinetics, however for very low or very high input frequencies  
407 slower or even more rapid kinetics might be favorable. We therefore varied the decay time-constant of the  
408 dendritic synapse model ( $\tau_{dendsyn}$ ) and the input frequency. CF remained at 1500 Hz in this experiment  
409 (Fig. 9B). Output rate improvement (Fig. 9B1) mostly depended on  $\tau_{dendsyn}$  in this experiment. It was robust  
410 for dendritic synaptic time-constants between 0.8 ms and 6 ms. Best increase of output rate occurred at  
411  $\tau_{dendsyn} = 3.3$  ms and 1272 Hz input frequency. A very sharp cutoff of efficacy in increasing the output rate  
412 occurred above  $\tau_{dendsyn} = 6$  ms for input frequencies around CF. Higher dendritic time-constants were very

413 detrimental for output spiking: Summation of dendritic EPSP here caused a tonic depolarization sufficient to  
414 strongly reduce the excitability of the SBC model. Interestingly, this cutoff value shows some frequency-  
415 dependency insofar as it extends towards much longer  $\tau_{\text{dend\textsubscript{syn}}}$  for frequencies below about 500 Hz, reaching  
416 14 ms for the lowest frequencies tested (125 Hz). Surprisingly, the cutoff value also extends towards longer  
417 time-constants for frequencies above 2000 Hz. A very similar pattern was evident for the quantification of  
418 the increase of temporal precision (Fig. 9B2) and advance of the preferred phase (Fig. 9B3). However, robust  
419 improvement of vector strength and advance of preferred phase occurred over a somewhat wider range of  
420  $\tau_{\text{dend\textsubscript{syn}}}$  values. Accordingly, the cutoff of the effect for input frequencies around CF occurred at higher  $\tau_{\text{dend\textsubscript{syn}}}$   
421 of 9 ms. This can be understood, since the effect on temporal precision and preferred phase mostly relied on  
422 the rising slopes of the  $V_m$  modulation (Fig. 6F&G) and even for very long dendritic decay-time constants  
423 detectable  $V_m$  modulation did occur (Fig. 4A2,B2). In contrast to this, the bulk of the effect of the increase in  
424 AP output rate seemed to be carried by the  $V_m$  depolarization, as it tonically moved the  $V_m$  closer to AP  
425 threshold. The tonic depolarization however monotonically rose with  $\tau_{\text{dend\textsubscript{syn}}}$  (Fig. 4A1) and at some point, as  
426 we showed here, reached values at which the positive effects were countered by the reduction of excitability  
427 (increased  $\text{Na}_v$  inactivation and KLT activation). Taken together, we concluded that phase-locked synaptic  
428 inputs with rather rapid synaptic time-constants of decay are a necessity to robustly exploit the effects of the  
429 dendritic synaptic inputs for SBC coding.

430 Overall our experiments in this section showed that the morphological and physiological parameters of the  
431 SBC dendrite and the synaptic inputs that connect there had considerable influence on the efficacy of the  
432 dendritic inputs in supporting the main endbulb input. Some dendritic features (length, diameter, expression  
433 of ionic conductances) might indeed serve as plausible biological tuning parameters to finely adjust the effect  
434 of dendritic inputs for specific input frequencies along the tonotopic axis or divergent coding demands of  
435 subpopulations of SBC.

436

#### 437 *Simulated dendritic inputs to realistic bushy dendrites*

438 Up to this point all conclusions were drawn from simulations that only included a stylized dendritic model  
439 with a linear arrangement of synaptic inputs. In the next step we wanted to test whether these conclusion also  
440 hold true in a complex, 3-dimensional branched dendrite model with randomly placed synapses that is closer  
441 to the real shape of SBC in the brain. We thus reconstructed dendrites from confocal stacks of gerbil SBC,  
442 which were filled with biocytin during whole-cell patch recordings (Fig. 10). We analyzed a total of  $N = 18$   
443 cells which had short dendrites that reached on average only up to  $83 \pm 19 \mu\text{m}$  from the soma. However, the  
444 dendrites were dense and quite complex with a mean number of  $36 \pm 16$  branchpoints and a total length of  
445 dendritic segments of  $1463 \pm 667 \mu\text{m}$ . A Sholl-analysis (Sholl, 1953) in 3D-space revealed a critical value of  
446  $18 \pm 3$  intersects at a critical range of  $38 \pm 12 \mu\text{m}$ . Mean value of intersects over all radii was  $8 \pm 2$  intersects.

447 These morphological data emphasized, that SBC dendrites did not reach far away from the location of the  
448 soma but showed surprisingly high complexity. The critical range could be interpreted as the distance from  
449 the soma, at which the cell receives most inputs with its dendritic tree. This was in our morphological  
450 reconstructions roughly 2 soma-diameters away from the cell under consideration and was thus most  
451 probably an area of the same or very similar characteristic frequency range of AN inputs. This illustrated  
452 well how locally dense the network of SBC dendrites in the gerbil AVCN must be (Gómez-Nieto and Rubio,  
453 2009). The 3D-reconstructed (and volume fitted – see method section) data for initially three SBC was  
454 carefully checked for consistency and imported as segments in NEURON. We attached the dendritic part to  
455 the stylized soma and axon segments of our SBC model. This was done to compare only the properties of the  
456 realistic dendritic tree, i.e. soma and axon compartments (white and red segments in Fig. 10B&C) were  
457 discarded for the following initial analysis. When we simulated phase-locked dendritic inputs and the  
458 interaction of their effects with the main axosomatic endbulb inputs we found qualitatively similar results as  
459 with the stylized dendrite (Fig. 11). However, individual dendritic synapses were electrotonically much  
460 further from the soma and thus much less effective. Thus, higher total dendritic conductances were needed to  
461 also achieve quantitatively comparable effects. This is illustrated in Fig. 11, where we simulated frequency  
462 response areas of a SBC with realistic dendritic tree without ( $g_{\text{dend\textit{syn}}} = 0$  nS) and with dendritic inputs,  
463 identical to Fig. 7. The overall features of the interaction of dendritic and endbulb inputs were identical: best  
464 increase of output rate for frequencies below CF (Fig. 11A-C), best increase of temporal precision (Fig. 11D-  
465 F) and strongest phase advance (Fig. 11G-I) for frequencies  $>1500$  Hz. In order to achieve these effects a  
466 higher total dendritic synaptic conductance ( $g_{\text{dend\textit{syn}}} = 64$  nS) was used. This can be understood as a greater  
467 electrotonic distance to the soma of a given dendritic synapse in the 3D-dendrite compared to the stylized  
468 dendrites. Of course the total membrane area, and thus the leak conductance, of the reconstructed dendrite is  
469 higher than the stylized dendrite. The efficacy of the dendritic synapses was also strongly influenced by  
470 narrow segments in the reconstructed structure, even when we enforced a minimal diameter of  $1\mu\text{m}$ . No  
471 qualitative differences between the different dendritic models tested were seen.

472 In summary we take these results obtained with realistic 3D dendrites as first evidence that our conclusions  
473 drawn from the stylized dendritic model are also valid for complex dendritic structures as described for SBC  
474 in the brain.

475

## 476 Discussion

477 In this study we demonstrated with a biologically plausible compartment model of spherical bushy cells  
478 that small, phase-locked dendritic excitatory inputs can augment temporal coding. The phase-locked activity  
479 of the dendritic inputs caused both tonic excitation and a modulation of the RMP at the frequency of the  
480 input. Interaction of a single axosomatic endbulb of Held input with the rising phase of the RMP modulation

481 enhanced the efficacy of the axosomatic input in a phase-dependent manner. Together with the tonic  
482 excitation this effect caused an increase in the number and temporal precision of output spikes of the model  
483 SBC.

484 For SBC that receive only a single axosomatic input we concluded, that phase-locked dendritic inputs are a  
485 plausible mechanism to improve temporal precision. The postsynaptic activity of dendritic inputs almost  
486 certainly would be inconspicuous in single-unit recordings in vivo or may be misclassified as microphonic  
487 responses of AN fibers. We hesitate to call this a novel suggestion, as this was one of the ideas brought up  
488 before in the context of the spherical cell puzzle (Joris and Smith, 2008). However, unlike the case of many  
489 interacting subthreshold inputs (Rothman et al., 1993; Xu-Friedman and Regehr, 2005a) and few  
490 suprathreshold inputs (Xu-Friedman and Regehr, 2005b) this arrangement of input strengths had not yet been  
491 theoretically explored before in the context of temporal coding. Our study thus represents an additional step  
492 towards understanding the remarkable complexity (Kuenzel, 2019) of this station of the auditory pathway.

493 The improvement in temporal precision, quantified as the difference in output vector strength without and  
494 with dendritic inputs (Fig. 7) was robust but quantitatively moderate. One could thus argue, that dendritic  
495 inputs only really play a minor role in temporal coding. In the same type of SBC model quantitatively similar  
496 findings were made for the effect of inhibitory inputs (Nerlich et al., 2014; Kuenzel et al., 2015) and  
497 cholinergic excitation (Goyer et al., 2016) on temporal precision. It is very hard to judge however, how these  
498 parallel mechanisms would interact in the intact brain during natural listening situations. We hypothesize that  
499 the combined contribution of individually smaller effects could summate substantially as well as provide  
500 dynamic flexibility for different coding demands. Furthermore, given the strong focus on temporal precision  
501 in sound localization circuitry of the medial superior olive (van der Heijden et al., 2013; Franken et al., 2014;  
502 Plauška et al., 2016) and the relatively low amount of convergence present at this station (Couchman et al.,  
503 2010), small increases in rate and precision of bushy cell outputs could have considerable functional impacts  
504 for sound localization using interaural time differences.

505 When we explored the influence of biophysical and morphological parameters on the effect of dendritic  
506 inputs (Figs. 1,5,8 & 9) our results suggested that dendritic parameters could be tuned to emphasize a  
507 specific effect (tonic vs. modulated excitation) and or matched to a specific range of input frequencies. The  
508 latter would argue for gradients of dendritic properties along the tonotopic axis of the ventral cochlear  
509 nucleus. For the avian homologue of the VCN, the nucleus magnocellularis, it was established that gradients  
510 of biophysical parameters (Fukui and Ohmori, 2004; Oline et al., 2016; Hong et al., 2018), especially voltage  
511 activated potassium conductances, optimize temporal coding for a given range of input frequencies.  
512 Furthermore, dendritic morphology of neurons in the chicken NM changes drastically with tonotopic  
513 position: low frequency neurons (Wang et al., 2017) have long dendrites while high frequency neurons are  
514 essentially adendritic. Tonotopic gradients are even more pronounced in nucleus laminaris (the analogue of  
515 the medial superior olive). Here both biophysical parameters (Kuba et al., 2005) and dendritic length (Korn



516 et al., 2011) smoothly varied with tonotopic position and it was convincingly shown that dendritic filters are  
517 tuned to match the tonotopic position (Slee et al., 2010). We thus think that it is not unreasonable to assume  
518 that similar tonotopic gradients could be present in the mammalian VCN. Unfortunately, to our knowledge,  
519 no study systematically analyzed biophysical nor morphological parameters along the tonotopic axis in the  
520 mammalian VCN. The oblique orientation of the tonotopic axis in the mammalian VCN (Ryugo and Parks,  
521 2003; Muniak et al., 2013) is the most likely reason for that. While Lauer et al. (2013) indeed show  
522 compelling ultrastructural and morphological differences between anterior and posterior positions they do  
523 not reconstruct or quantify dendritic structures. In the VCN, specifically for bushy cells, cell size does  
524 roughly correlate with tonotopic position as low frequency BC, if present, are larger than high frequency BC  
525 (Cant and Casseday, 1986; Bazwinsky et al., 2008) (cat; gerbil). However, no systematic differences of  
526 dendritic shapes have been reported or analyzed yet. Given the complex and dense nature of the bushy  
527 dendrites it might well be that simple morphological metrics (long vs. short path, narrow vs. wide field) do  
528 not catch the essential tuning parameters. A careful 3D-reconstruction of numerous bushy dendrites, as we  
529 (in this study) and others have begun, will in our opinion be necessary to resolve this question. Unfortunately  
530 at this moment our set of dendritic reconstruction derived from in vitro patch recordings in oblique brain  
531 slices, only offers rough positional estimates on the tonotopic identity of the cells. A systematic study of  
532 spherical bushy cell dendritic morphology filled in-vivo after single-unit recordings (Pinault, 1996; Kuenzel  
533 et al., 2011) would be most useful for this question. Nevertheless, from binaural nuclei of the mammalian  
534 auditory brainstem it is well known, that cell size (Weatherstone et al., 2017) (MNTB) and biophysical  
535 properties (Barnes-Davies et al., 2004; von Hehn et al., 2004; Leao et al., 2006) (LSO; both MNTB) can vary  
536 with tonotopic position. We overall conclude that tuning of postsynaptic and dendritic parameters along the  
537 tonotopic axis also in the mammalian VCN is a plausible proposal.

538 Since very little is known about the properties of bushy dendrites and dendritic synaptic inputs, one  
539 wonders how biologically plausible our parameters were. First, the fact that at least some of these inputs are  
540 axodendritic contacts of endbulb structures contacting another SBC soma (Ostapoff and Morest, 1991;  
541 Ryugo and Sento, 1991; Gómez-Nieto and Rubio, 2009) lead us to model these dendritic inputs with rapid  
542 kinetics and robust temporal precision. The actual number of inputs does seem much less critical than the  
543 total synaptic conductance (Fig. 8B1), as higher total conductances could cause erroneous spiking (Fig. 3E3)  
544 or strong reduction in output rates (Fig. 8B1). To us this demonstrates the use of our in-silico approach, as  
545 unknown parameters can be at least narrowed to a more biologically plausible range. Other dendritic  
546 excitatory inputs (Kuenzel, 2019) to bushy cells do not necessarily have robust phase-locking or rapid  
547 kinetics. Our results show that these inputs, given the total active dendritic conductance remains in a  
548 reasonable range, would still contribute to temporal processing by increasing the amount of well-timed  
549 spikes the cell generates upon endbulb of Held input activity. It was recently shown that even non-auditory  
550 inputs to the VCN can influence temporal coding (Heeringa et al., 2018). Our model also provides

551 mechanistic explanations for these findings and suggests a common role of excitatory inputs to spherical  
552 bushy cell dendrites: dendritic inputs gate and modulate the processing of auditory temporal information  
553 along the main endbulb-soma-axon path.

554 Finally we want to comment on the realistic 3D-dendritic structures we used in a first attempt to  
555 understand the role of the bushy dendritic structure. While we have confidence in the reconstruction of the  
556 overall shape and connectivity of dendrites, the faithful estimation of the diameter of small dendritic  
557 segments based on confocal laser-scanning microscopy was difficult due to technical limitations. Since the  
558 algorithm used produced very narrow segments ( $< 0.3 \mu\text{m}$ ) whenever the fluorescent signal was locally  
559 weak, we enforced a minimal diameter of  $1 \mu\text{m}$ . Still, rapid changes of narrow dendritic segments and local  
560 swellings of larger diameter were commonly seen. Whether this is an artefact of the fixation and staining or  
561 biologically relevant we can not state at this moment. We thus refrained from starting a more in depth  
562 analysis of the properties of the 3D-dendrites (i.e. mapping electrotonic distance) at this point. The technical  
563 difficulties with volume estimation are a known limitation in reconstructing 3D dendritic structures (Ascoli  
564 et al., 2001) and an area of active research (Ming et al., 2013; Luo et al., 2015). In the future more  
565 sophisticated methods should be employed to derive segment diameters from 3D microscopy data. Indeed, a  
566 morphological dataset of tonotopically identified spherical bushy cells obtained with super- or ultra-  
567 resolution (Holcomb et al., 2013) methods would greatly help modeling efforts to better understand the  
568 peculiar nature of the bushy dendritic structure of this cell type. Nevertheless we are convinced that our  
569 modeling effort provides interesting insights into the dendritic function at this level of the auditory pathway  
570 and opens promising avenues for further experimental work in this system.

571

## 572 **Figure Captions**

573 Fig. 1. Phase-locked dendritic inputs caused both a tonic and a modulated subthreshold membrane  
574 response in the SBC model. *A*: Overview of the compartment model and parameters used in simulations.  
575 Note that for initial experiments the endbulb of Held (EoH) was not simulated. Dend1: primary dendrite  
576 section, Dend2: secondary dendrite section, AIS: axon initial segment, N: number of inputs,  $g_{\text{syn}}$ : conductance  
577 of one dendritic synaptic input,  $\tau$ : decay time-constant of dendritic synaptic inputs, L: length of primary  
578 dendrite section, D: diameter of primary dendrite section, Syn N: dendritic synapse number N,  $g_{\text{h}}$ :  
579 hyperpolarization activated conductance,  $g_{\text{KLT}}$ : low voltage activated potassium conductance,  $g_{\text{leak}}$ : leak  
580 conductance. *B*: Spike times of  $N = 32$  statistically independent simulated AN fibers upon 50 ms,  
581 65 dB SPL, 125 Hz tone stimulation. Spike-times were used as activation times for the corresponding  
582 synaptic mechanisms. *C*: Membrane potential response at the soma of the SBC model upon activation of  
583 dendritic synapse #1 only. *D*: Membrane potential response at the soma of the SBC model upon activation of  
584 all  $N = 32$  dendritic synapses. Note that synaptic events summated to cause both a modulation of the

585 membrane potential at the stimulus frequency and an increase of the average membrane potential (tonic  
586 depolarization).

587

588 Fig. 2. Morphology of the primary dendrite section influenced tonic and modulated subthreshold  
589 membrane responses of the model SBC caused by phase-locked dendritic inputs. *A*: Mean membrane  
590 potential (*A1*) and mean modulation amplitude (*A2*) were reduced with increasing length of the primary  
591 dendrite section  $L(\text{Dend1})$ , when  $D(\text{Dend1}) = 3 \mu\text{m}$ . Solid line: model with free total membrane resistance  
592  $R_m$ . In this model,  $R_m$  increased with increasing  $L$ , as more membrane area is added. Dashed line: model with  
593 fixed total membrane resistance  $R_m$ . In this model,  $R_m$  was kept constant by reducing the specific leak  
594 conductance as the membrane area changed. For these and the following plot a minimum of 64 conditions  
595 were tested and at least 2 s of stimulus presentation was simulated per condition. *B*: Example traces (*B1*) and  
596 membrane potential averaged over the stimulus cycles (*B2*) for different  $L(\text{Dend1})$ . In *B1*, ten cycles of the  
597 stimulus are shown from 5 different example conditions. Linecolor in *B1* and *B2* indicates example values  
598 from low (dark) to high (bright). *C*: Mean membrane potential (*C1*) and mean modulation amplitude (*C2*)  
599 were maximal for dendrites of  $3.3 \mu\text{m}$  and gradually reduced for diameters  $D(\text{Dend1})$  above and below this  
600 value. Dendritic length was constant,  $L(\text{Dend1}) = 50 \mu\text{m}$ . *D*: Example traces (*D1*) and membrane potential  
601 averaged over the stimulus cycles (*D2*) for different  $D(\text{Dend1})$ . Presentation as in *B*. *E*: Contour-plots  
602 showing the mean membrane potential (*E1*) and mean modulation amplitude (*E2*) for 625 ( $25 \times 25$ )  
603 combinations of  $L$  and  $D$ . Both parameters mostly depended on  $L(\text{Dend1})$  with a specific slope that  
604 depended on  $D(\text{Dend1})$ .

605

606 Fig. 3. Effect of phase-locked dendritic inputs on tonic and modulated subthreshold SBC membrane  
607 responses was only weakly influenced by dendritic synapse number but strongly by total dendritic  
608 conductance. *A*: Mean membrane potential (*A1*) and mean modulation amplitude (*A2*) were not influenced  
609 by number of dendritic synapses  $N$  above  $N = 15$  (*A1*) or  $N = 23$  (*A2*). Total dendritic synaptic conductance  
610 was constant ( $g_{\text{syn}} = 16 \text{ nS}$ ). Below these low values parameters steeply declined with lower  $N$ . *B*: Example  
611 data for result shown in *A*, presentation as in Fig. 1B. *C*: Total dendritic synaptic conductance  $g_{\text{syn}}$  had a  
612 strong influence on mean membrane potential (*C1*) and mean modulation amplitude (*C2*). With increasing  
613  $g_{\text{syn}}$  of  $N = 16$  synapses, both parameters monotonically increased. *D*: Example data for results shown in *C*,  
614 presentation as in Fig. 1B. *E*: Contour-plots showing the mean membrane potential (*E1*) and mean  
615 modulation amplitude (*E2*) for 625 ( $25 \times 25$ ) combinations of  $N$  and  $g_{\text{syn}}$ . Effects mainly depended on  $g_{\text{syn}}$ .  
616 The number of action potentials triggered by dendritic inputs per condition is shown in the contour plot in  
617 *E3*.

618

619 Fig. 4. Temporal characteristics of inputs and dendritic synapses inversely affected tonic and modulated  
620 subthreshold membrane responses of the model SBC. *A*: Mean membrane potential (*A1*) and mean  
621 modulation amplitude (*A2*) were differentially affected by the decay time-constant of the dendritic synaptic  
622 conductance. Input frequency was 200 Hz. Mean membrane potential monotonically increased with decay  
623 tau, but mean modulation amplitude was maximal for tau = 1.77 ms and declined steeply for values above  
624 and below. *B*: Example data for result shown in *A*, presentation as in Fig. 1B. *C*: Input frequency, expressed  
625 here as duration of one cycle of the stimulus, weakly influenced mean membrane potential (*C1*). Shorter  
626 cycle duration / higher frequencies caused slightly higher tonic depolarization (for a synaptic decay time  
627 constant of tau = 2 ms). Mean modulation amplitude (*C2*) however increased strongly with increasing cycle  
628 duration. *D*: Example data for results shown in *C*, presentation as in Fig. 1B. *E*: Contour-plots showing the  
629 mean membrane potential (*E1*) and mean modulation amplitude (*E2*) for 625 (25 x 25) combinations of  
630 dendritic decay tau and cycle duration. The greatest variation of mean membrane potentials with decay tau  
631 occurred for short cycle durations. Modulation amplitudes were greatest for a limited range of short decay  
632 time constants and long cycle durations.

633

634 Fig. 5. Passive and voltage-activated and dendritic conductances differentially affect tonic and modulated  
635 subthreshold membrane responses of the model SBC. *A*: Mean membrane potential (*A1*) was strongly  
636 reduced by low-voltage activated potassium conductance  $g_{KLT}$  but mean modulation amplitudes (*A2*) were  
637 hardly affected. *B*: Example data for result shown in *A*, presentation as in Fig. 1B. *C*: Mean membrane  
638 potential (*C1*) increased with increasing dendritic hyperpolarization-activated conductance  $g_h$ . However,  $g_h$   
639 had only very minor influence on mean modulation amplitudes (*C2*). *D*: Example data for result shown in *C*,  
640 presentation as in Fig. 1B. *E*: Both the mean membrane potential (*E1*) and mean modulation amplitude (*E2*)  
641 were strongly reduced by increasing dendritic passive leak conductance  $g_{leak}$ . *F*: Example data for result  
642 shown in *E*, presentation as in Fig. 1B. *G*: Contour-plots showing the mean membrane potential (*G1*) and  
643 mean modulation amplitude (*G2*) for 625 (25 x 25) combinations of  $g_h$  and  $g_{KLT}$ .  $g_h$  and  $g_{KLT}$  inversely affect  
644 the subthreshold membrane responses of the model SBC.

645

646 Fig. 6. Dendritic inputs enhance endbulb of Held transmission efficacy. *A*: Schematic of the model used in  
647 the following experiments. The endbulb of Held axosomatic input is modeled as a conductance point source  
648 connected to the soma. *B*: Example trace of membrane potential responses of the SBC model with endbulb  
649 of Held input but without dendritic inputs upon simulated sound stimulation (1000 Hz, 65 dB SPL,  
650 CF = 1000 Hz). Successful endbulb to SBC transmission events, i.e. action potentials, marked with green  
651 dots. Failed transmissions, i.e. excitatory postsynaptic potentials, marked with red dots. Blue dots show  
652 timing of endbulb input events. All markers refer to the same time axis. Thick black line shows duration of

653 simulated stimulus presentation. *C*: Cycle histogram of spike times relative to the input cycle for the SBC  
654 output spikes in *B*. Red vertical line shows mean phase angle of the events (preferred phase  $\phi$ ). *D*: Example  
655 trace of membrane potential responses of the SBC model with endbulb of Held input with  $N = 32$ ,  
656  $g_{\text{syn}} = 16$  nS dendritic inputs upon simulated sound stimulation (1000 Hz, 65 dB SPL, CF = 1000 Hz).  
657 Presentation as in *B*. Note the lower amount of failed transmissions. *E*: Cycle histogram of spike times  
658 relative to the input cycle for the SBC output spikes in *D*. Presentation as in *C*. Note the higher amount of  
659 events, the higher vector strength and the phase advance. *F*: Phase relation of endbulb of Held input events  
660 and the membrane potential modulation caused by the dendritic inputs determines the efficacy of the endbulb  
661 of Held input. Exemplary single activations of the endbulb of Held synapse at 25 (5 x 5) different  
662 combinations of peak conductance values and EoH activation times in relation to the stimulus cycle (1 s for a  
663 1000Hz stimulus). Upper row, no dendritic inputs. Shades of grey indicate different endbulb peak  
664 conductance values. Middle row, with 16 nS dendritic synaptic inputs, shades of green indicate different  
665 endbulb peak conductance values. Bottom row, representation of the stimulus waveform. Vertical arrow  
666 marks temporal position of endbulb activation. *G*: Contour plots showing AP amplitude ( $G1$ ,  $G2$ ) and  
667 endbulb activation to peak AP delay ( $G3$ ,  $G4$ ) for 625 (25 x 25) combinations of EoH activation times and  
668 peak conductance without ( $G1$ ,  $G3$ ) and with ( $G1$ ,  $G4$ ) dendritic inputs. Hashed area with red boundary  
669 indicates conditions in which no AP was elicited.

670

671 Fig. 7. Dendritic inputs differentially affect SBC response rates and temporal coding dependent on stimulus  
672 condition. *A*: Contour plot of the frequency-response area of the SBC model without dendritic inputs, i.e. the  
673 output AP rate upon 1024 combinations of 32 different stimulus frequencies and 32 different stimulus sound  
674 pressure levels. 5 s of stimulus presentation were simulated per condition. CF = 1500 Hz. Yellow contours  
675 represent 80 Hz and 170 Hz output rate. *B*: Contour plot of the frequency-response area of the SBC model  
676 with  $N = 32$ ,  $g_{\text{syn}} = 16$  nS dendritic inputs. Presentation as in *A*. Note the higher response rates visualized by  
677 the greater area demarcated by the 170 Hz contour. *C*: Difference between the data shown in *A* and *B*  
678 quantifies the effect of the dendritic inputs. Note the different color scheme: white signifies no difference,  
679 increasing intensity of red (blue) signifies increasing positive (negative) difference. Highest differences at  
680 and below CF. *D, E, F*: Contour plot of the temporal precision of the output AP quantified as vector strength  
681 without (*D*) and with (*E*) dendritic inputs, differences shown in *F*. Temporal precision is most affected at  
682 stimulus frequencies at and above CF. Yellow contours represent  $VS = 0.6$ . Presentation as in *A-C*. *G, H, I*:  
683 Contour plot of the mean phase  $\phi$  of output AP without (*G*) and with (*H*) dendritic inputs, differences shown  
684 in *I*. Presentation as in *A-C*. Note that the phase advance mostly accompanied the changes in VS, not the  
685 changes in output AP rate.

686

687 Fig. 8. Dendritic morphology and biophysics influence the effects of dendritic inputs on output spike rate  
688 and temporal coding. *A*: Contour plots of the difference in output AP rate (*A1*), vector strength (*A2*) and  
689 preferred phase  $\phi$  (*A3*) between the model without and with dendritic inputs for 1024 (32 x 32) combinations  
690 of length and diameter of the primary dendrite. Presentation of these difference plots as Fig. 7C. *B*: Contour  
691 plots of the difference in output AP rate (*B1*), vector strength (*B2*) and preferred phase  $\phi$  (*B3*) between the  
692 model without and with dendritic inputs for 1024 (32 x 32) combinations of total dendritic synaptic  
693 conductance  $g_{\text{syn}}$  and the number of dendritic synaptic inputs  $N_{\text{syn}}$ . Presentation of these difference plots as  
694 Fig. 7C. *C*: Contour plots of the difference in output AP rate (*C1*), vector strength (*C2*) and preferred phase  $\phi$   
695 (*C3*) between the model without and with dendritic inputs for 1024 (32 x 32) combinations of total  
696 characteristic frequency CF in kHz and the dendritic low voltage-activated potassium conductance  $g_{\text{KLT}}$ .  
697 Presentation of these difference plots as Fig. 7C.

698

699 Fig. 9. Effects of dendritic inputs on output spike rate and temporal coding depends on tonotopy and the  
700 interplay between inputs and kinetics of the dendritic synapses. *A*: Contour plots of the difference in output  
701 AP rate (*A1*), vector strength (*A2*) and preferred phase  $\phi$  (*A3*) between the model without and with dendritic  
702 inputs for 1024 (32 x 32) combinations of input frequency (in kHz) and characteristic frequency of the SBC  
703 model (in kHz). Presentation of these difference plots as Fig. 7C. *B*: Contour plots of the difference in output  
704 AP rate (*B1*), vector strength (*B2*) and preferred phase  $\phi$  (*B3*) between the model without and with dendritic  
705 inputs for 1024 (32 x 32) combinations of input frequency (in kHz) and the decay time-constant of dendritic  
706 synaptic inputs  $\tau_{\text{dend, syn}}$ . Presentation of these difference plots as Fig. 7C.

707

708 Fig. 10. 3D representation of the bushy dendrite for the SBC compartment model. *A*: Confocal image  
709 (maximal projection) of a gerbil SBC filled with biocytin during whole-cell patch recording in acute brain  
710 slices in vitro. *B*: 3D model of the dendritic segments reconstructed from the confocal images in *A*. Soma  
711 (red) and axon sections (white) visible in the left half of the image, were not used for modeling, only the  
712 proximal dendritic section (blue) and distal dendritic arbors attached to this (yellow, green, magenta) were  
713 used for the compartment model.

714

715 Fig. 11. Effect of dendritic inputs connected to realistic 3D dendritic structures are qualitatively identical to  
716 effects seen with the stylized dendrite model. *A-I*: Contour plots of the output AP rate (*A-C*), temporal  
717 precision (*D-F*) and preferred phase (*G-I*) of the SBC model with a 3D dendrite model. Stimulus conditions  
718 and data presentation identical to Fig. 7.

719

## 720 References

- 721 **Ascoli GA, Krichmar JL, Nasuto SJ, and Senft SL.** Generation, description and storage of dendritic morphology data  
722 *Philos. Trans. R. Soc. B* 356: 1131-1145, 2001. doi:10.1098/rstb.2001.0905.
- 723 **Barnes-Davies M, Barker MC, Osmani F, and Forsythe ID.** Kv1 currents mediate a gradient of principal neuron  
724 excitability across the tonotopic axis in the rat lateral superior olive. *Eur. J. Neurosci.* 19: 325-333, 2004.  
725 doi:10.1111/j.0953-816x.2003.03133.x.
- 726 **Bazwinsky I, Härtig W, and RübSamen R.** Characterization of cochlear nucleus principal cells of *Meriones*  
727 *unguiculatus* and *Monodelphis domestica* by use of calcium-binding protein immunolabeling. *J. Chem. Neuroanat.* 35:  
728 158-74, 2008. doi:10.1016/j.jchemneu.2007.10.003.
- 729 **Blackburn CC, and Sachs MB.** Classification of unit types in the anteroventral cochlear nucleus: PST histograms and  
730 regularity analysis. *J. Neurophysiol.* 62: 1303-29, 1989. doi:.
- 731 **Borst JGG.** The low synaptic release probability in vivo. *Trends Neurosci.* 33: 259-266, 2010.  
732 doi:10.1016/j.tins.2010.03.003.
- 733 **Campagnola L, and Manis PB.** A map of functional synaptic connectivity in the mouse anteroventral cochlear  
734 nucleus. *J. Neurosci.* 34: 2214-30, 2014. doi:10.1523/JNEUROSCI.4669-13.2014.
- 735 **Cant NB, and Benson CG.** Parallel auditory pathways: projection patterns of the different neuronal populations in the  
736 dorsal and ventral cochlear nuclei. *Brain Res. Bull.* 60: 457-74, 2003. doi:10.1016/S0361-9230(03)00050-9.
- 737 **Cant NB, and Casseday JH.** Projections from the anteroventral cochlear nucleus to the lateral and medial superior  
738 olivary nuclei. *J. Comp. Neurol.* 247: 457-76, 1986. doi:10.1002/cne.902470406.
- 739 **Cao X-J, and Oertel D.** Auditory nerve fibers excite targets through synapses that vary in convergence, strength, and  
740 short-term plasticity. *J. Neurophysiol.* 104: 2308-20, 2010. doi:10.1152/jn.00451.2010.
- 741 **Couchman K, Grothe B, and Felmy F.** Medial superior olivary neurons receive surprisingly few excitatory and  
742 inhibitory inputs with balanced strength and short-term dynamics. *J. Neurosci.* 30: 17111-17121, 2010.  
743 doi:10.1523/JNEUROSCI.1760-10.2010.
- 744 **Felmy F, and Künzel T.** Giant synapses in the central auditory system *e-Neuroforum* 5: 53-59, 2014.  
745 doi:10.1007/s13295-014-0060-x.
- 746 **Fisher, N. I.** *Statistical Analysis of Circular Data.* Cambridge University Press, 1993.
- 747 **Franken TP, Bremen P, and Joris PX.** Coincidence detection in the medial superior olive: mechanistic implications of  
748 an analysis of input spiking patterns. *Front. Neural Circuits* 8: 42, 2014. doi:10.3389/fncir.2014.00042.
- 749 **Fukui I, and Ohmori H.** Tonotopic gradients of membrane and synaptic properties for neurons of the chicken nucleus  
750 magnocellularis. *J. Neurosci.* 24: 7514-23, 2004. doi:10.1523/JNEUROSCI.0566-04.2004.
- 751 **Gillet C, Goyer D, Kurth S, Griebel H, and Kuenzel T.** Cholinergic Innervation of Principal Neurons in the Cochlear  
752 Nucleus of the Mongolian Gerbil *J. Comp. Neurol.* 526: 1647-1661, 2018. doi:.
- 753 **Gillet C, Kurth S, and Kuenzel T.** Muscarinic modulation of M and h currents in gerbil spherical bushy cells. *PLoS*  
754 *One* 15: e0226954, 2020. doi:10.1371/journal.pone.0226954.
- 755 **Goldberg JM, and Brown PB.** Response of binaural neurons of dog superior olivary complex to dichotic tonal stimuli:  
756 some physiological mechanisms of sound localization. *J. Neurophysiol.* 32: 613-36, 1969. doi:.
- 757 **Gómez-Nieto R, and Rubio ME.** A bushy cell network in the rat ventral cochlear nucleus. *J. Comp. Neurol.* 516: 241-  
758 63, 2009. doi:10.1002/cne.22139.
- 759 **Goyer D, Kurth S, Gillet C, Keine C, RübSamen R, and Kuenzel T.** Slow Cholinergic Modulation of Spike  
760 Probability in Ultra-Fast Time-Coding Sensory Neurons. *eNeuro* 3, 2016. doi:10.1523/ENEURO.0186-16.2016.
- 761 **Heeringa AN, Wu C, and Shore SE.** Multisensory Integration Enhances Temporal Coding in Ventral Cochlear Nucleus  
762 Bushy Cells *J. Neurosci.* : 2244-17, 2018. doi:10.1523/JNEUROSCI.2244-17.2018.
- 763 **von Hehn CAA, Bhattacharjee A, and Kaczmarek LK.** Loss of Kv3.1 tonotopicity and alterations in cAMP response  
764 element-binding protein signaling in central auditory neurons of hearing impaired mice. *J. Neurosci.* 24: 1936-1940,  
765 2004. doi:10.1523/JNEUROSCI.4554-03.2004.
- 766 **van der Heijden M, Lorteije JAM, Plauška A, Roberts MT, Golding NL, and Borst JGG.** Directional hearing by  
767 linear summation of binaural inputs at the medial superior olive. *Neuron* 78: 936-948, 2013.  
768 doi:10.1016/j.neuron.2013.04.028.

- 769 **Holcomb PS, Hoffpauir BK, Hoyson MC, Jackson DR, Deerinck TJ, Marrs GS, Dehoff M, Wu J, Ellisman MH,**  
770 **and Spirou GA.** Synaptic inputs compete during rapid formation of the calyx of Held: a new model system for neural  
771 development. *J. Neurosci.* 33: 12954-12969, 2013. doi:10.1523/JNEUROSCI.1087-13.2013.
- 772 **Hong H, Wang X, Lu T, Zorio DAR, Wang Y, and Sanchez JT.** Diverse Intrinsic Properties Shape Functional  
773 Phenotype of Low-Frequency Neurons in the Auditory Brainstem. *Front. Cell. Neurosci.* 12: 175, 2018.  
774 doi:10.3389/fncel.2018.00175.
- 775 **Joris PX, Carney LH, Smith PH, and Yin TC.** Enhancement of neural synchronization in the anteroventral cochlear  
776 nucleus. I. Responses to tones at the characteristic frequency. *J. Neurophysiol.* 71: 1022-36, 1994a.  
777 doi:10.1152/jn.1994.71.3.1022.
- 778 **Joris PX, and Smith PH.** The volley theory and the spherical cell puzzle. *Neuroscience* 154: 65-76, 2008. doi:10.1016/  
779 j.neuroscience.2008.03.002.
- 780 **Joris PX, Smith PH, and Yin TC.** Enhancement of neural synchronization in the anteroventral cochlear nucleus. II.  
781 Responses in the tuning curve tail. *J. Neurophysiol.* 71: 1037-51, 1994b. doi:10.1152/jn.1994.71.3.1037.
- 782 **Keine C, and RübSamen R.** Inhibition Shapes Acoustic Responsiveness in Spherical Bushy Cells *J. Neurosci.* 35:  
783 8579-8592, 2015. doi:10.1523/JNEUROSCI.0133-15.2015.
- 784 **Keine C, RübSamen R, and Englitz B.** Inhibition in the auditory brainstem enhances signal representation and  
785 regulates gain in complex acoustic environments. *eLife* 5: 1-33, 2016. doi:10.7554/eLife.19295.
- 786 **Keine C, RübSamen R, and Englitz B.** Signal integration at spherical bushy cells enhances representation of temporal  
787 structure but limits its range *eLife* 6: 1-16, 2017. doi:10.7554/eLife.29639.
- 788 **Korn MJ, Koppel SJ, and Cramer KS.** Astrocyte-secreted factors modulate a gradient of primary dendritic arbors in  
789 nucleus laminaris of the avian auditory brainstem. *PLoS One* 6: e27383, 2011. doi:10.1371/journal.pone.0027383.
- 790 **Kuba H, Yamada R, Fukui I, and Ohmori H.** Tonotopic specialization of auditory coincidence detection in nucleus  
791 laminaris of the chick. *J. Neurosci.* 25: 1924-34, 2005. doi:10.1523/JNEUROSCI.4428-04.2005.
- 792 **Kuenzel T.** Modulatory influences on time-coding neurons in the ventral cochlear nucleus. *Hear. Res.* 384: 107824,  
793 2019. doi:10.1016/j.heares.2019.107824.
- 794 **Kuenzel T, Borst JGG, and van der Heijden M.** Factors Controlling the Input-Output Relationship of Spherical  
795 Bushy Cells in the Gerbil Cochlear Nucleus *J. Neurosci.* 31: 4260-4273, 2011. doi:10.1523/JNEUROSCI.5433-  
796 10.2011.
- 797 **Kuenzel T, Nerlich J, Wagner H, RübSamen R, and Milenkovic I.** Inhibitory properties underlying non-monotonic  
798 input-output relationship in low-frequency spherical bushy neurons of the gerbil *Front. Neural Circuits* 9: 1-14, 2015.  
799 doi:10.3389/fncir.2015.00014.
- 800 **Lauer AM, Connelly CJ, Graham H, and Ryugo DK.** Morphological characterization of bushy cells and their inputs  
801 in the laboratory mouse (*Mus musculus*) anteroventral cochlear nucleus. *PLoS One* 8: e73308, 2013.  
802 doi:10.1371/journal.pone.0073308.
- 803 **Leao RN, Sun H, Svahn K, Berntson A, Yousoufian M, Paolini AG, Fyffe REW, and Walmsley B.** Topographic  
804 organization in the auditory brainstem of juvenile mice is disrupted in congenital deafness. *J. Physiol. (Lond.)* 571:  
805 563-578, 2006. doi:10.1113/jphysiol.2005.098780.
- 806 **Longair MH, Baker DA, and Armstrong JD.** Simple Neurite Tracer: open source software for reconstruction,  
807 visualization and analysis of neuronal processes. *Bioinformatics* 27: 2453-2454, 2011.  
808 doi:10.1093/bioinformatics/btr390.
- 809 **Luo G, Sui D, Wang K, and Chae J.** Neuron anatomy structure reconstruction based on a sliding filter. *BMC Bioinf.*  
810 16: 342, 2015. doi:10.1186/s12859-015-0780-0.
- 811 **Malinowski ST, Wolf J, and Kuenzel T.** Intrinsic and Synaptic Dynamics Contribute to Adaptation in the Core of the  
812 Avian Central Nucleus of the Inferior Colliculus. *Front. Neural Circuits* 13: 46, 2019. doi:10.3389/fncir.2019.00046.
- 813 **Ming X, Li A, Wu J, Yan C, Ding W, Gong H, Zeng S, and Liu Q.** Rapid reconstruction of 3D neuronal morphology  
814 from light microscopy images with augmented rayburst sampling. *PLoS One* 8: e84557, 2013.  
815 doi:10.1371/journal.pone.0084557.
- 816 **Muniak MA, Rivas A, Montey KL, May BJ, Francis HW, and Ryugo DK.** 3D model of frequency representation in  
817 the cochlear nucleus of the CBA/J mouse *J. Comp. Neurol.* 521: 1510-1532, 2013. doi:10.1002/cne.23238.



- 818 **Nerlich J, Kuenzel T, Keine C, Korenic A, Rübsamen R, and Milenkovic I.** Dynamic fidelity control to the central  
819 auditory system: synergistic glycine/GABAergic inhibition in the cochlear nucleus. *J. Neurosci.* 34: 11604-20, 2014.  
820 doi:10.1523/JNEUROSCI.0719-14.2014.
- 821 **Oertel D, Shatadal S, and Cao X-J.** In the ventral cochlear nucleus Kv1.1 and subunits of HCN1 are colocalized at  
822 surfaces of neurons that have low-voltage-activated and hyperpolarization-activated conductances. *Neuroscience* 154:  
823 77-86, 2008. doi:10.1016/j.neuroscience.2008.01.085.
- 824 **Oline SN, Ashida G, and Burger RM.** Tonotopic Optimization for Temporal Processing in the Cochlear Nucleus. *J.*  
825 *Neurosci.* 36: 8500-15, 2016. doi:10.1523/JNEUROSCI.4449-15.2016.
- 826 **Ostapoff E-M, and Morest DK.** Synaptic organization of globular bushy cells in the ventral cochlear nucleus of the  
827 cat: A quantitative study *J. Comp. Neurol.* 314: 598-613, 1991. doi:10.1002/cne.903140314.
- 828 **Pinault D.** A novel single-cell staining procedure performed in vivo under electrophysiological control: morpho-  
829 functional features of juxtacellularly labeled thalamic cells and other central neurons with biocytin or Neurobiotin. *J.*  
830 *Neurosci. Methods* 65: 113-36, 1996. doi:10.1016/0165-0270(95)00144-1.
- 831 **Plauška A, Borst JG, and van der Heijden M.** Predicting binaural responses from monaural responses in the gerbil  
832 medial superior olive. *J. Neurophysiol.* 115: 2950-2963, 2016. doi:10.1152/jn.01146.2015.
- 833 **Rothman JS, Young ED, and Manis PB.** Convergence of auditory nerve fibers onto bushy cells in the ventral cochlear  
834 nucleus: implications of a computational model. *J. Neurophysiol.* 70: 2562-83, 1993. doi:.
- 835 **Rothman JSS, and Young EDD.** Enhancement of neural synchronization in computational models of ventral cochlear  
836 nucleus bushy cells *Auditory Neuroscience* 2: 47-62, 1996. doi:.
- 837 **Rudnicki M, Schoppe O, Isik M, Völk F, and Hemmert W.** Modeling auditory coding: from sound to spikes *Cell*  
838 *Tissue Res.* 361: 159-175, 2015. doi:10.1007/s00441-015-2202-z.
- 839 **Ryugo D, and Parks TN.** Primary innervation of the avian and mammalian cochlear nucleus *Brain Res. Bull.* 60: 435-  
840 456, 2003. doi:10.1016/S0361-9230(03)00049-2.
- 841 **Ryugo DK, and Sento S.** Synaptic connections of the auditory nerve in cats: relationship between endbulbs of held and  
842 spherical bushy cells. *J. Comp. Neurol.* 305: 35-48, 1991. doi:10.1002/cne.903050105.
- 843 **Schindelin J, Arganda-Carreras I, Frise E, Kaynig V, Longair M, Pietzsch T, Preibisch S, Rueden C, Saalfeld S,  
844 Schmid B, Tinevez J-Y, White DJ, Hartenstein V, Eliceiri K, Tomancak P, and Cardona A.** Fiji: an open-source  
845 platform for biological-image analysis. *Nature methods* 9: 676-682, 2012. doi:10.1038/nmeth.2019.
- 846 **Sholl DA.** Dendritic organization in the neurons of the visual and motor cortices of the cat. *J. Anat.* 87: 387-406, 1953.  
847 doi:unavailable.
- 848 **Slee SJ, Higgs MH, Fairhall AL, and Spain WJ.** Tonotopic tuning in a sound localization circuit. *J. Neurophysiol.*  
849 103: 2857-2875, 2010. doi:10.1152/jn.00678.2009.
- 850 **Smith PH, Joris PX, and Yin TC.** Projections of physiologically characterized spherical bushy cell axons from the  
851 cochlear nucleus of the cat: evidence for delay lines to the medial superior olive. *J. Comp. Neurol.* 331: 245-60, 1993.  
852 doi:10.1002/cne.903310208.
- 853 **Spirou GA, Rager J, and Manis PB.** Convergence of auditory-nerve fiber projections onto globular bushy cells.  
854 *Neuroscience* 136: 843-63, 2005. doi:10.1016/j.neuroscience.2005.08.068.
- 855 **Versteegh CPC, Meenderink SWF, and van der Heijden M.** Response characteristics in the apex of the gerbil  
856 cochlea studied through auditory nerve recordings. *JARO* 12: 301-16, 2011. doi:10.1007/s10162-010-0255-y.
- 857 **Wang X, Hong H, Brown DH, Sanchez JT, and Wang Y.** Distinct Neural Properties in the Low-Frequency Region of  
858 the Chicken Cochlear Nucleus Magnocellularis *eNeuro* 4: ENEURO.0016-17.2017, 2017. doi:10.1523/eneuro.0016-  
859 17.2017.
- 860 **Weatherstone JH, Kopp-Scheinflug C, Pilati N, Wang Y, Forsythe ID, Rubel EW, and Tempel BL.** Maintenance  
861 of neuronal size gradient in MNTB requires sound-evoked activity. *J. Neurophysiol.* 117: 756-766, 2017.  
862 doi:10.1152/jn.00528.2016.
- 863 **Wei L, Karino S, Verschooten E, and Joris PX.** Enhancement of phase-locking in rodents. I. An axonal recording  
864 study in gerbil. *J. Neurophysiol.* 118: 2009-2023, 2017. doi:10.1152/jn.00194.2016.
- 865 **Xu-Friedman MA, and Regehr WG.** Dynamic-clamp analysis of the effects of convergence on spike timing. I. Many  
866 synaptic inputs. *J. Neurophysiol.* 94: 2512-2525, 2005a. doi:10.1152/jn.01307.2004.
- 867 **Xu-Friedman MA, and Regehr WG.** Dynamic-Clamp Analysis of the Effects of Convergence on Spike Timing. II.  
868 Few Synaptic Inputs *J. Neurophysiol.* 94: 2526-2534, 2005b. doi:10.1152/jn.01308.2004.

Koert et al.

*Bushy-cell dendritic inputs*

- 869 **Young ED, and Sachs MB.** Auditory nerve inputs to cochlear nucleus neurons studied with cross-correlation.  
870 *Neuroscience* 154: 127-38, 2008. doi:10.1016/j.neuroscience.2008.01.036.
- 871 **Zilany MSA, Bruce IC, and Carney LH.** Updated parameters and expanded simulation options for a model of the  
872 auditory periphery *J. Acoust. Soc. Am.* 135: 283-286, 2014. doi:10.1121/1.4837815.
- 873 **Zilany MSA, Bruce IC, Nelson PC, and Carney LH.** A phenomenological model of the synapse between the inner  
874 hair cell and auditory nerve: long-term adaptation with power-law dynamics. *J. Acoust. Soc. Am.* 126: 2390-412, 2009.  
875 doi:10.1121/1.3238250.
- 876

877 **Table 1.** Morphological and biophysical parameters of the SBC compartment model.

|               | L<br>( $\mu\text{m}$ ) | D<br>( $\mu\text{m}$ ) | nseg | $g_{\text{leak}}$<br>( $\text{S}/\text{cm}^2$ ) | $g_{\text{Nav}}$<br>( $\text{S}/\text{cm}^2$ ) | $g_{\text{KHT}}$<br>( $\text{S}/\text{cm}^2$ ) | $g_{\text{KLT}}$<br>( $\text{S}/\text{cm}^2$ ) | $g_{\text{H}}$<br>( $\text{S}/\text{cm}^2$ ) | $C_{\text{m}}$<br>( $\mu\text{F}/\text{cm}^2$ ) |
|---------------|------------------------|------------------------|------|-------------------------------------------------|------------------------------------------------|------------------------------------------------|------------------------------------------------|----------------------------------------------|-------------------------------------------------|
| Soma          | 19.5                   | 19.5                   | 9    | 0.001                                           | 0.01                                           | 0.013                                          | 0.017                                          | 0.002                                        | 1                                               |
| Dend1         | 50                     | 3                      | 21   | 0.001                                           | 0                                              | 0                                              | 0.0085                                         | 0.001                                        | 1                                               |
| Dend2         | 50                     | 3                      | 100  | 0.001                                           | 0                                              | 0                                              | 0                                              | 0                                            | 1                                               |
| AIS           | 15                     | 4                      | 3    | 0.001                                           | 0.53                                           | 0.01                                           | 0                                              | 0                                            | 1                                               |
| Axon          | 100                    | 2                      | 10   | 0.0001                                          | 0                                              | 0                                              | 0                                              | 0                                            | 0.1                                             |
| proximal (3D) | -                      | -                      | -    | 0.001                                           | 0                                              | 0                                              | 0.0085                                         | 0.001                                        | 1                                               |
| distal (3D)   | -                      | -                      | -    | 0.001                                           | 0                                              | 0                                              | 0                                              | 0                                            | 1                                               |

878

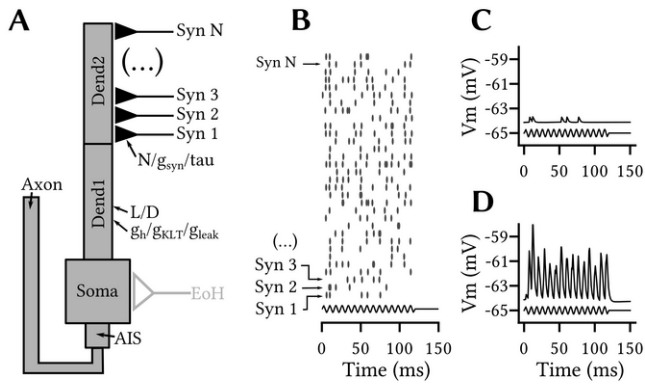

879

880 Fig. 1.

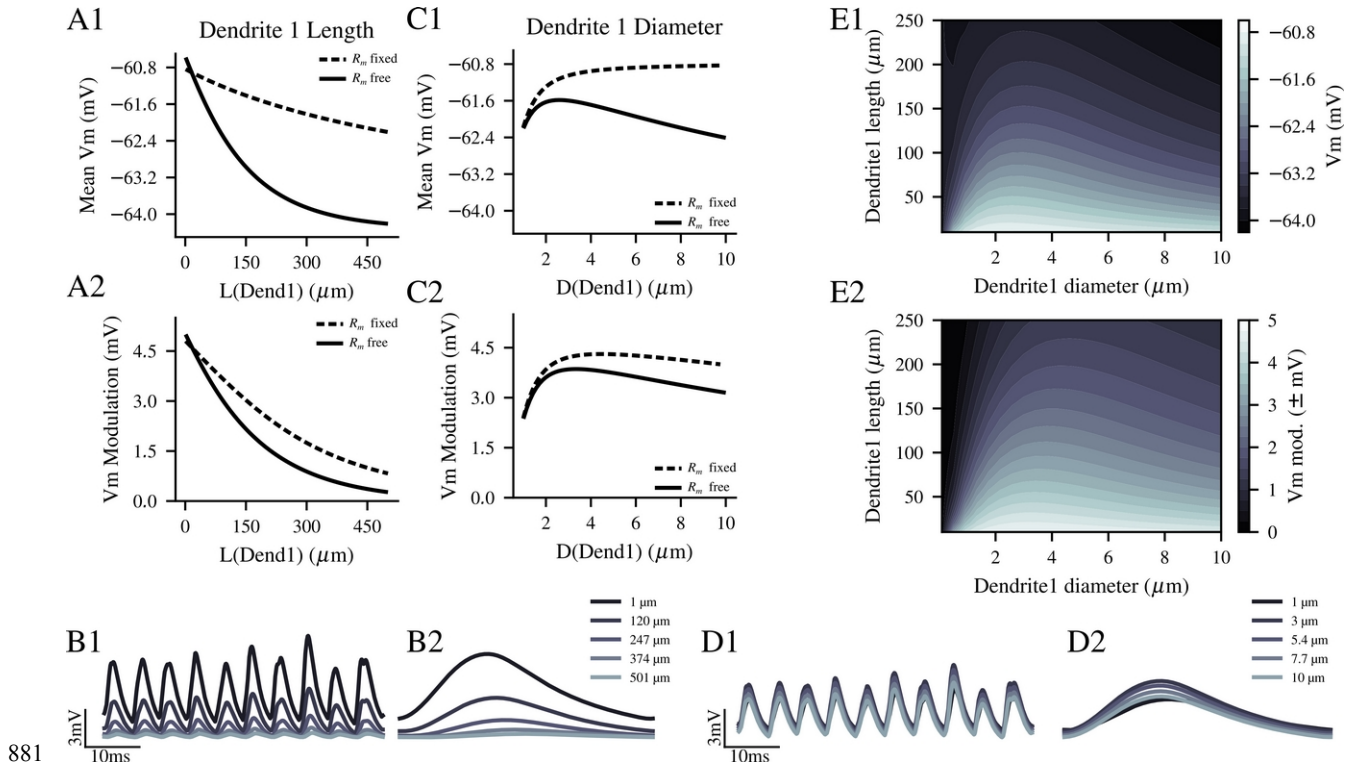

881

882 Fig. 2.

Koert et al.

Bushy-cell dendritic inputs

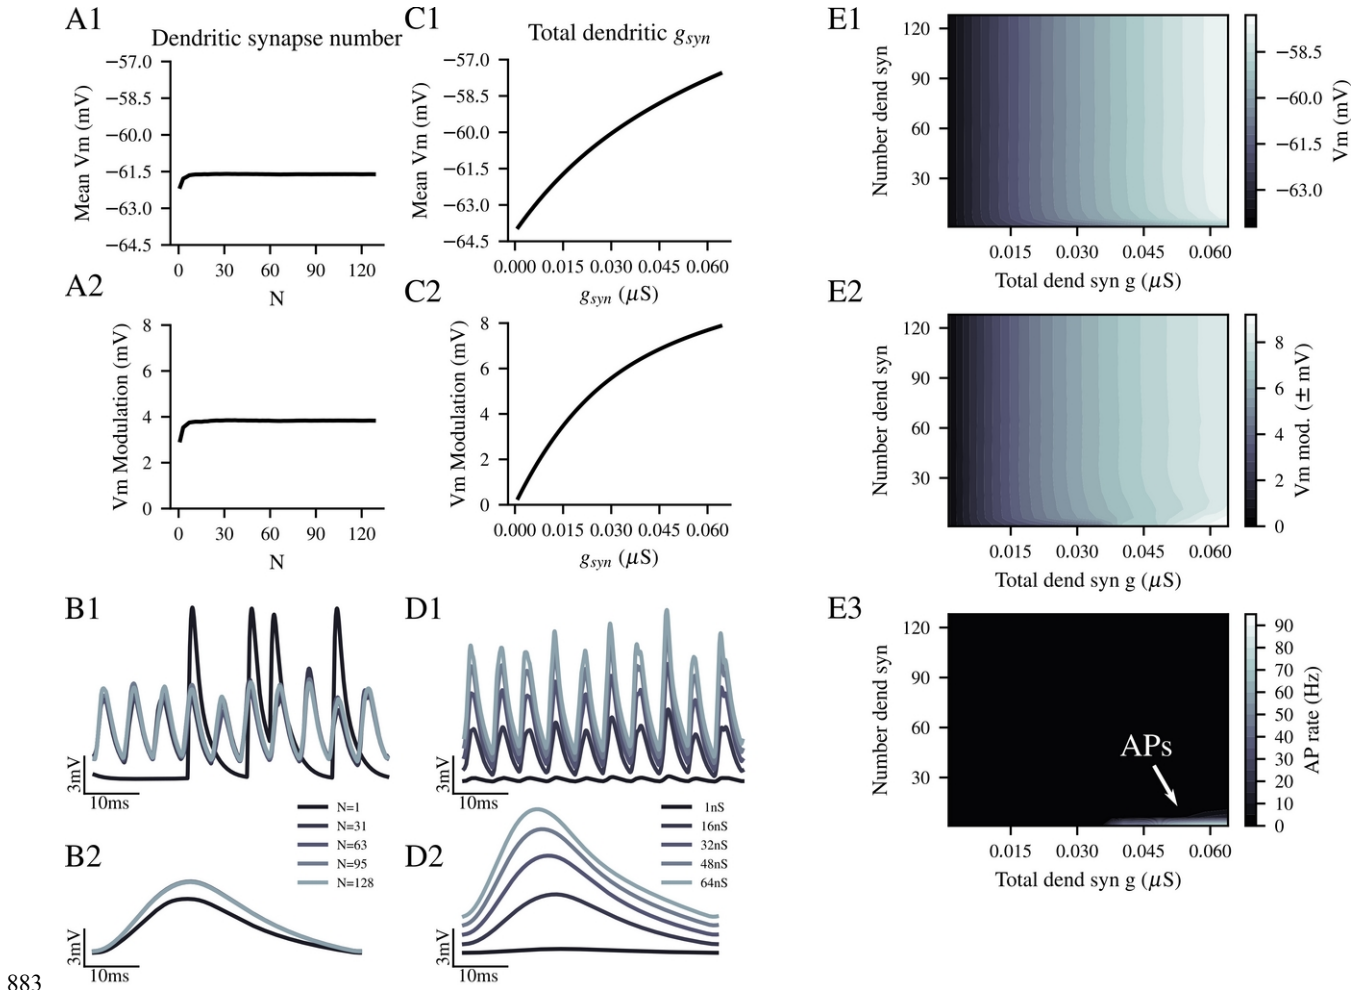

883

884 Fig. 3.

Koert et al.

Bushy-cell dendritic inputs

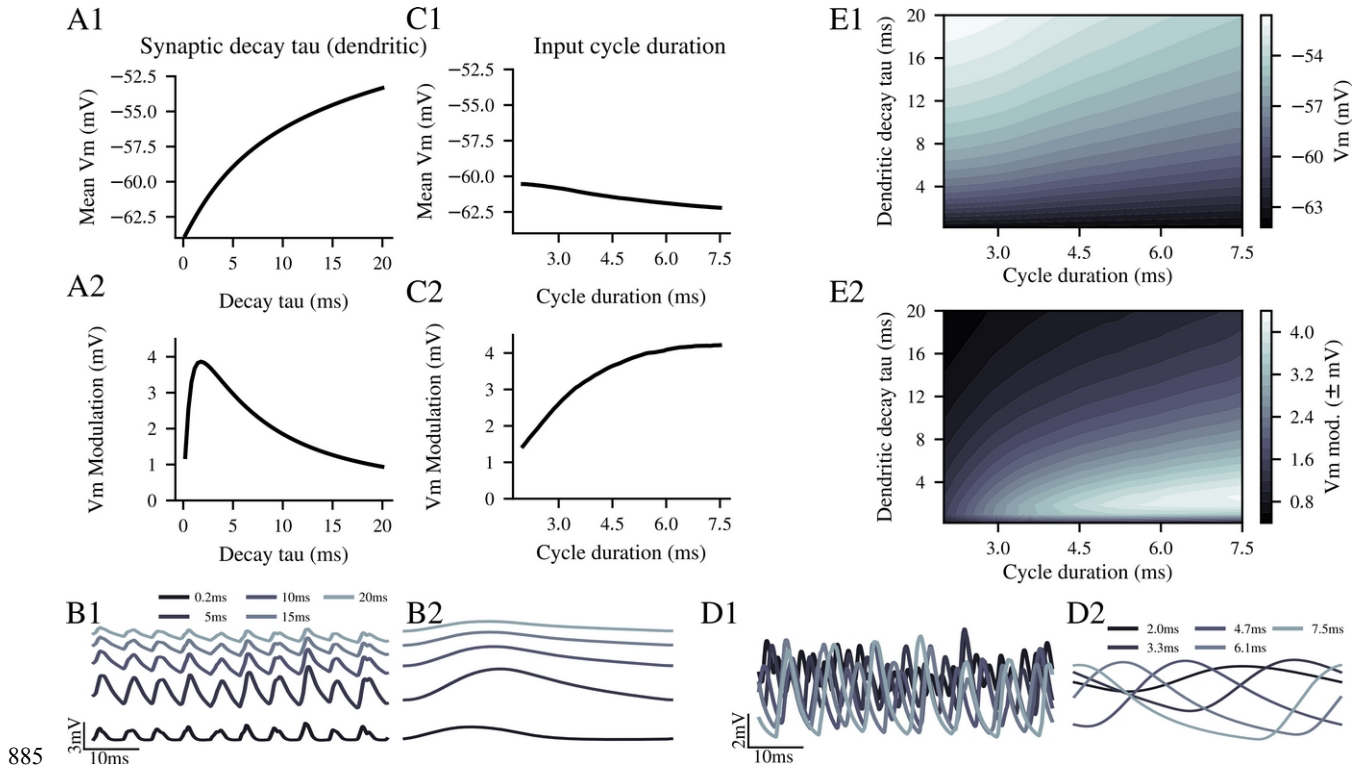

885

886 Fig. 4.

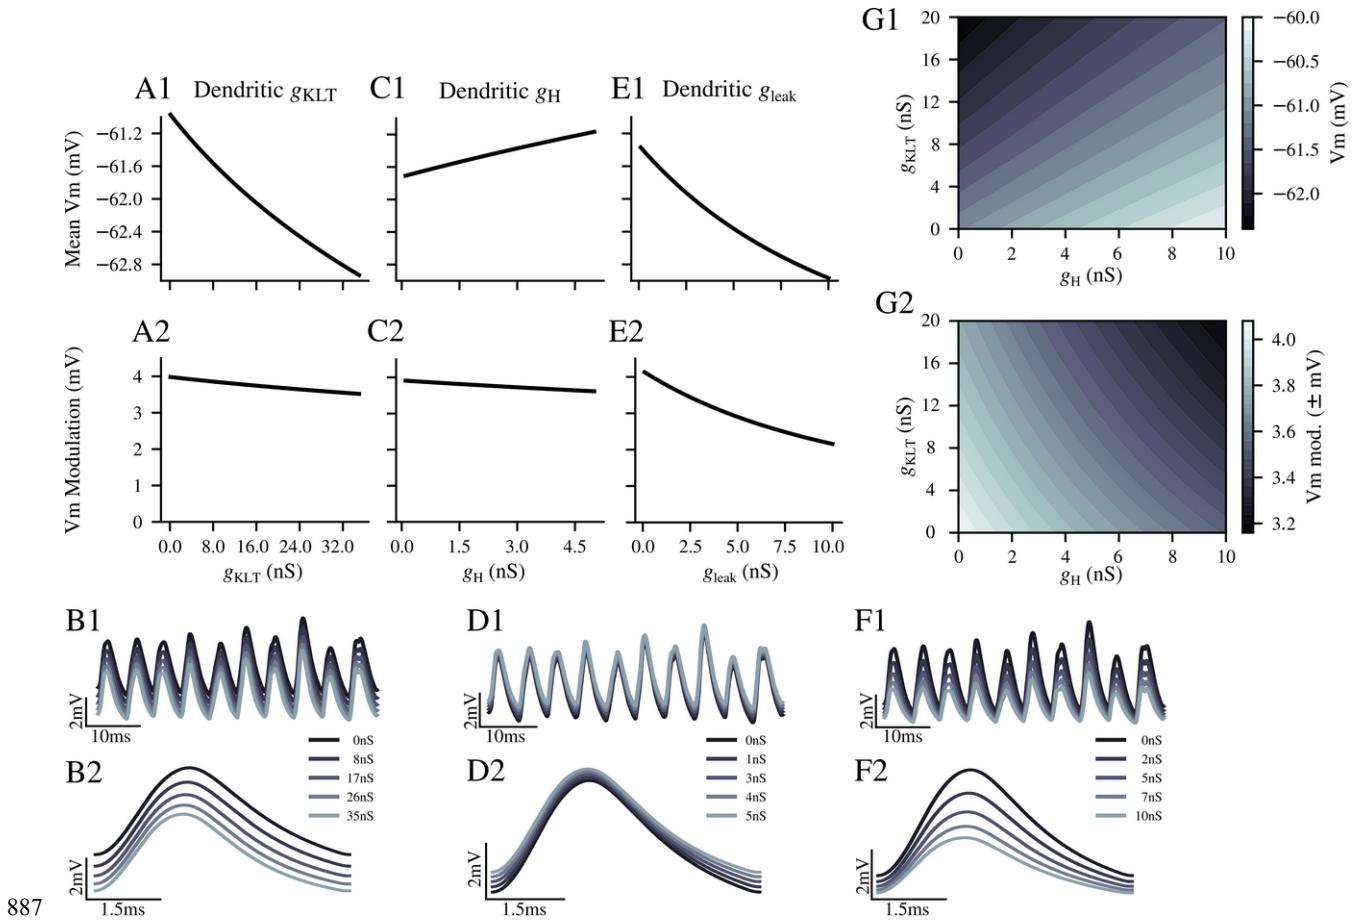

887

888 Fig. 5.



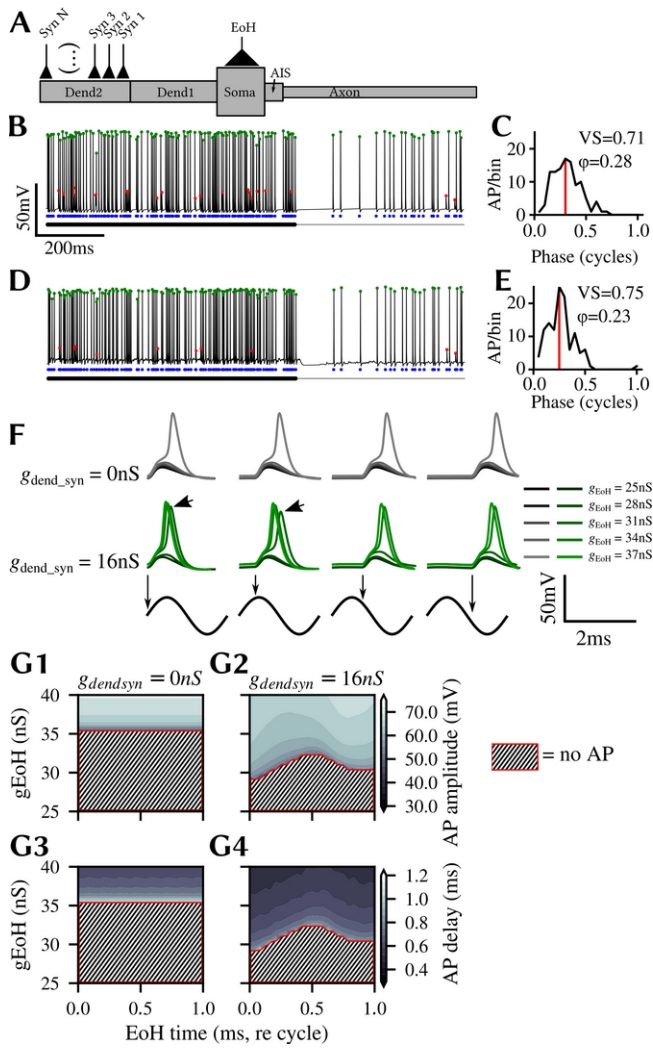

889

890 Fig. 6.

Koert et al.

Bushy-cell dendritic inputs

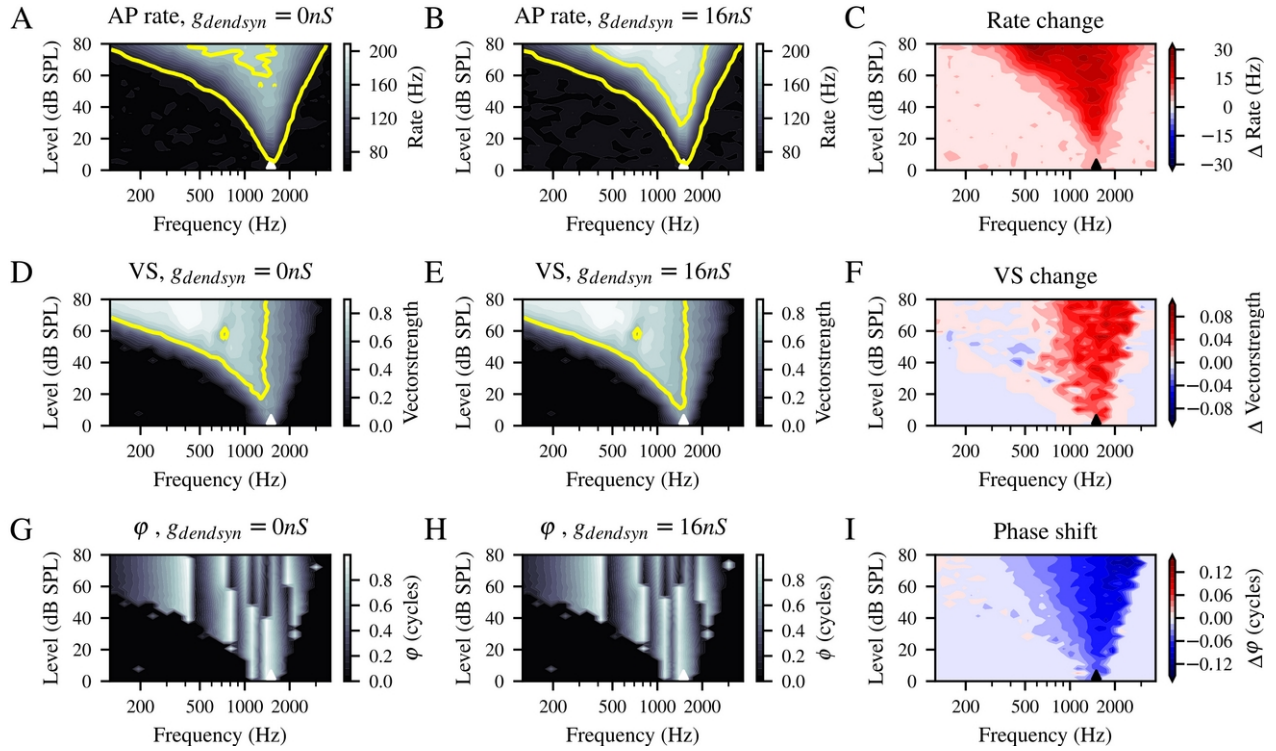

891

892 Fig. 7.

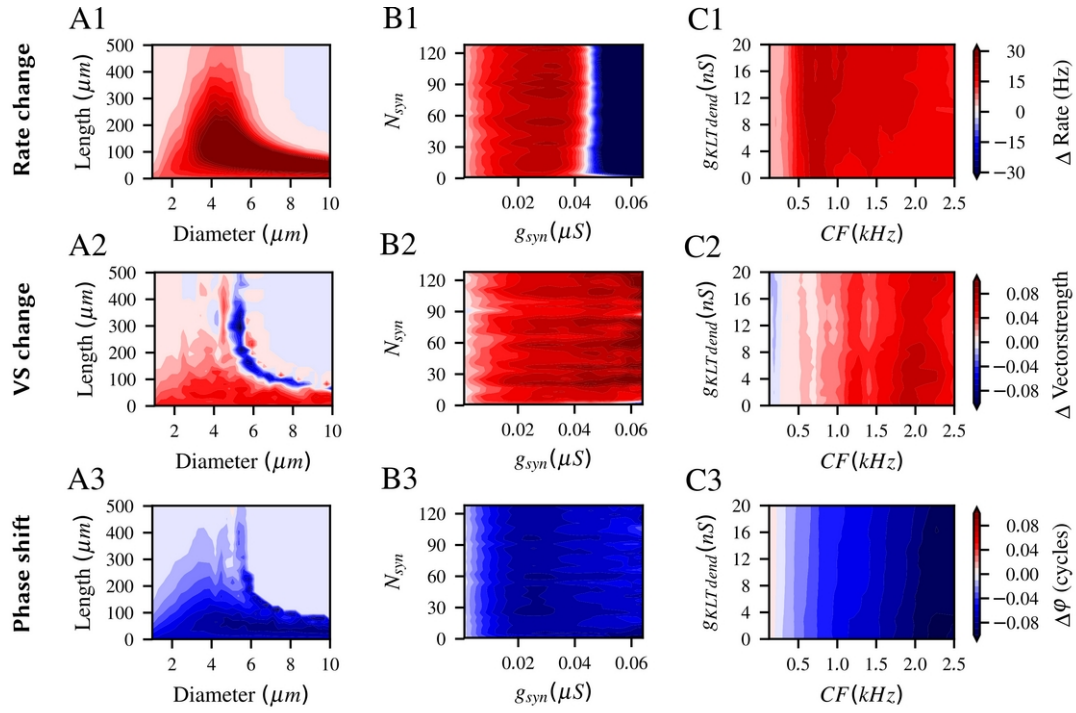

893

894 Fig. 8.

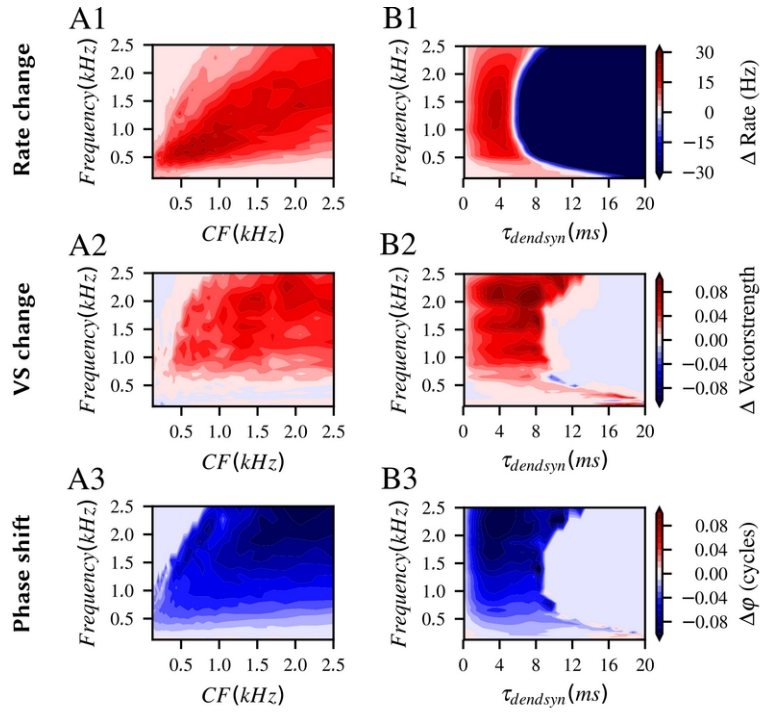

895

896 Fig. 9.

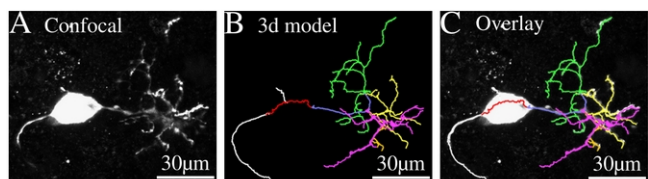

897

898 Fig. 10.

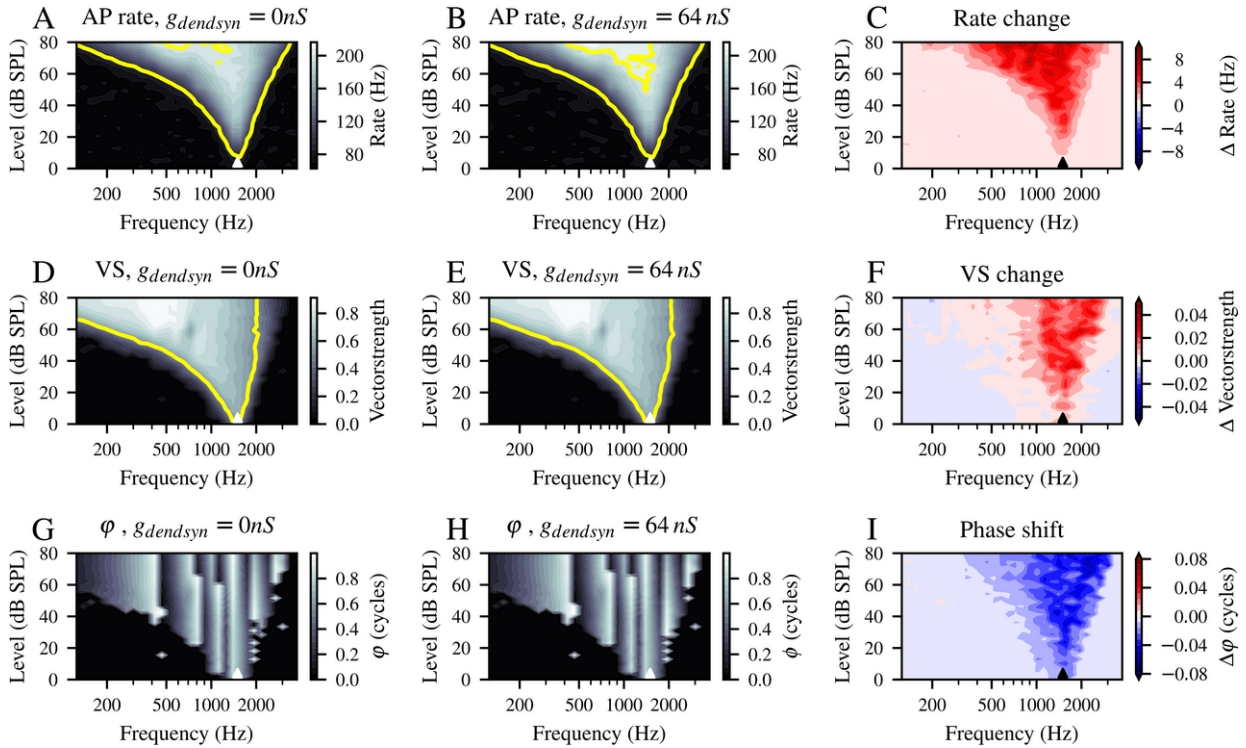

899

900 Fig. 11.
